# Supplementary material
Source: MDPI journal article supplement (https://www.mdpi.com/2073-4441/14/5/817)
Supplement: s1 [file s1]

## Supplementary S1: Extreme rainfall events

List of international peer-reviewed papers found via online on Scopus using keywords like "Extreme rainfall events" in combination with "Mediterranean Basin". The list is in chronological order according to the year of publication from 2000 to 2021.

1. Arnaud, P.; Lavabre, J. A stochastic model of hourly rainfall with rainfall-runoff transformation for predicting flood frequency. *Rev. Sci. Eau* **2000**, *13*, 441-462. <https://doi.org/10.7202/705402ar>.
2. Gabella, M.; Joss, J.; Perona, G.; Galli, G. Accuracy of rainfall estimates by two radars in the same Alpine environment using gage adjustment. *J. Geophys. Res-Atmos.* **2001**, *106*, 5139-5150. <https://doi.org/10.1029/2000JD900487>.
3. Camarasa Belmonte, A.M.; Beltrán, F.S. Flood events in Mediterranean ephemeral streams (ramblas) in Valencia region, Spain. *Catena* **2001**, *45*, 229-249. [https://doi.org/10.1016/S0341-8162\(01\)00146-1](https://doi.org/10.1016/S0341-8162(01)00146-1).
4. Pastor, F.; Estrela, M.J.; Peñarrocha, D.; Millán, M.M. Torrential rains on the Spanish Mediterranean coast: Modeling the effects of the sea surface temperature. *J. Appl. Meteorol.* **2001**, *40*, 1180-1195. [https://doi.org/10.1175/1520-0450\(2001\)040<1180:TROTSM>2.0.CO;2](https://doi.org/10.1175/1520-0450(2001)040<1180:TROTSM>2.0.CO;2).
5. Mayes, J.C. Maltese drought decisively doused. *J. Meteorol.* **2001**, *26*, 49-54.
6. Mayes, J. Rainfall variability in the Maltese Islands: changes, causes and consequences. *Geography* **2001**, *86*, 121-130.
7. Claps, P.; Fiorentino, M.; Iacobellis, V. Influence of climate on the flood frequency distribution within a large region of southern Italy. *IAHS Publ.* **2002**, *271*, 25-30.
8. Lázaro, R.; Rodrigo, F.S.; Gutiérrez, L.; Domingo, F.; Puigdefábregas, J. Analysis of a 30-year rainfall record (1967-1997) in semi-arid SE Spain for implications on vegetation. *J. Arid Environ.* **2001**, *48*, 373-395. <https://doi.org/10.1006/jare.2000.0755>.
9. Pinto, J.G. Influence of large-scale atmospheric circulation and baroclinic waves on the variability of mediterranean rainfall. Ph.D Thesis, Universität zu Köln, Germany, 2002.
10. Palutikof, J.P.; Goodess, C.M.; Watkins, S.J.; Holt, T. Generating rainfall and temperature scenarios at multiple sites: examples from the Mediterranean. *J. Climate* **2002**, *15*, 3529-3548. [https://doi.org/10.1175/1520-0442\(2002\)015<3529:GRATSA>2.0.CO;2](https://doi.org/10.1175/1520-0442(2002)015<3529:GRATSA>2.0.CO;2).
11. Vandenschrick, G.; van Wesemael, B.; Frot, E.; Pulido-Bosch, A.; Molina, L.; Stiévenard, M.; Souchez, R. Using stable isotope analysis ( $\delta D$ - $\delta^{18}O$ ) to characterise the regional hydrology of the Sierra de Gador, south east Spain. *J. Hydrol.* **2002**, *265*, 43-55. [https://doi.org/10.1016/S0022-1694\(02\)00097-5](https://doi.org/10.1016/S0022-1694(02)00097-5).
12. Peñarrocha, D.; Estrela, M.J.; Millán, M. Classification of daily rainfall patterns in a Mediterranean area with extreme intensity levels: the Valencia region. *Int. J. Climatol.* **2002**, *22*, 677-695. <https://doi.org/10.1002/joc.747>.
13. Ayalon, A.; Bar-Matthews, M.; Kaufman, A. Climatic conditions during marine oxygen isotope stage 6 in the eastern Mediterranean region from the isotopic composition of speleothems of Soreq Cave, Israel. *Geology* **2002**, *30*, 303-306. [https://doi.org/10.1130/0091-7613\(2002\)030<0303:CCDMOI>2.0.CO;2](https://doi.org/10.1130/0091-7613(2002)030<0303:CCDMOI>2.0.CO;2).
14. Homar, V.; Romero, R.; Ramis, C.; Alonso, S. Numerical study of the October 2000 torrential precipitation event over eastern Spain: analysis of the synoptic-scale stationarity. *Ann. Geophys.* **2002**, *20*, 2047-2066. <https://doi.org/10.5194/angeo-20-2047-2002>.
15. Gioia, G.; Iacobellis, V.; Margiotta, M.R. Assessment of a simplified runoff model for theoretical derivation of the probability distribution of floods. *IAHS Publ.* **2002**, *271*, 271-276.
16. Thomas, W.; Baier, F.; Erbertseder, T.; Kaästner, M. Analysis of the Algerian severe weather event in November 2001 and its impact on ozone and nitrogen dioxide distributions. *Tellus B* **2003**, *55*, 993-1006. <https://doi.org/10.3402/tellusb.v55i5.16392>.
17. Rigo, T.; Llasat, M.D.C. Flash floods and heavy rain events in Catalonia: analysis of the 1996-2000 period. *IAHS Publ.* **2003**, *278*, 269-275.
18. De Luis, M.; González-Hidalgo, J.C.; Raventós, J. Effects of fire and torrential rainfall on erosion in a Mediterranean gorse community. *Land Degrad. Dev.* **2003**, *14*, 203-213. <https://doi.org/10.1002/ldr.547>.
19. Salsón, S.; Garcia-Bartual, R. A space-time rainfall generator for highly convective Mediterranean rainstorms. *Nat. Hazards Earth Syst. Sci.* **2003**, *3*, 103-114. <https://doi.org/10.5194/nhess-3-103-2003>.
20. Neppel, L.; Bouvier, C.; Desbordes, M.; Vinet, F. A possible origin for the increase in floods in the Mediterranean region. *Rev. Sci. Eau* **2003**, *16*, 475-494. <https://doi.org/10.7202/705519ar>.
21. Sala, M. Floods triggered by natural conditions and by human activities in a Mediterranean coastal environment. *Geogr. Ann. A* **2003**, *85*, 301-312. <https://doi.org/10.1111/j.0435-3676.2003.00207.x>.

22. González Hidalgo, J.C.; De Luís, M.; Raventós, J.; Sánchez, J.R. Daily rainfall trend in the Valencia Region of Spain. *Theor. Appl. Climatol.* **2003**, *75*, 117-130. <https://doi.org/10.1007/s00704-002-0718-0>.
23. Schiller, G.; Korol, L.; Shklar, G. Habitat effects on adaptive genetic variation in *Pinus halepensis* Mill. provenances. *For. Genet.* **2004**, *11*, 325-335.
24. González-Hidalgo, J.C.; De Luís, M.; Raventós, J.; Cortina, J.; Sánchez, J.R. Hydrological response of Mediterranean gorse shrubland under extreme rainfall simulation event. *Z. Geomorphol.* **2004**, *48*, 293-304. <https://doi.org/10.1127/zfg/48/2004/293>.
25. De Luis, M.; Raventós, J.; Cortina, J.; González-Hidalgo, J.C.; Sánchez, J.R. Fire and torrential rainfall: Effects on the perennial grass *Brachypodium retusum*. *Plant Ecol.* **2004**, *173*, 225-232. <https://doi.org/10.1023/B:VEGE.0000029321.92655.a6>.
26. Diodato, N. Local models for rainstorm-induced hazard analysis on Mediterranean river-torrential geomorphological systems. *Nat. Hazards Earth Syst. Sci.* **2004**, *4*, 389-397. <https://doi.org/10.5194/nhess-4-389-2004>.
27. Haylock, M.R.; Goodess, C.M. Interannual variability of European extreme winter rainfall and links with mean large-scale circulation. *Int. J. Climatol.* **2004**, *24*, 759-776. <https://doi.org/10.1002/joc.1033>.
28. Martínez-Casasnovas, J.A.; Ramos, M.C.; Poesen, J. Assessment of sidewall erosion in large gullies using multi-temporal DEMs and logistic regression analysis. *Geomorphology* **2004**, *58*, 305-321. <https://doi.org/10.1016/j.geomorph.2003.08.005>.
29. Ramos, M.C.; Martínez-Casasnovas, J.A. Nutrient losses from a vineyard soil in Northeastern Spain caused by an extraordinary rainfall event. *Catena* **2004**, *55*, 79-90. [https://doi.org/10.1016/S0341-8162\(03\)00074-2](https://doi.org/10.1016/S0341-8162(03)00074-2).
30. Casas, M.C.; Codina, B.; Redaño, A.; Lorente, J. A methodology to classify extreme rainfall events in the western Mediterranean area. *Theor. Appl. Climatol.* **2004**, *77*, 139-150. <https://doi.org/10.1007/s00704-003-0003-x>.
31. Rigo, T.; Llasat, M.C. A methodology for the classification of convective structures using meteorological radar: Application to heavy rainfall events on the Mediterranean coast of the Iberian Peninsula. *Nat. Hazards Earth Syst. Sci.* **2004**, *4*, 59-68. <https://doi.org/10.5194/nhess-4-59-2004>.
32. Ducrocq, V.; Lebeaupin, C.; Thouvenin, T.; Giordani, H.; Chancibault, K.; Anquetin, S.; Saulnier, G.M. The 8-9 September 2002 extreme flash-flood: Meteorological description and mesoscale simulations. *Houille Blanche* **2004**, *90*, 86-92. <https://doi.org/10.1051/lhb:200406012>.
33. Gaume, E.; Bouvier, C. Hydrological analysis of the Gard and Vidourle river floods on the 8th and 9th September 2002. *Houille Blanche* **2004**, *90*, 99-106. <https://doi.org/10.1051/lhb:200406014>.
34. de Luís, M.; Raventós, J.; González-Hidalgo, J.C. Fire and torrential rainfall: Effects on seedling establishment in Mediterranean gorse shrublands. *Int. J. Wildland Fire* **2005**, *14*, 413-422. <https://doi.org/10.1071/WF05037>.
35. Cosandey, C.; Andréassian, V.; Martin, C.; Didon-Lescot, J.F.; Lavabre, J.; Folton, N.; Mathys, N.; Richard, D. The hydrological impact of the Mediterranean forest: A review of French research. *J. Hydrol.* **2005**, *301*, 235-249. <https://doi.org/10.1016/j.jhydrol.2004.06.040>.
36. Nigrelli, G. Analysis and characteristics of pluviometric events in the Germanasca Valley (Italian Western Alps). *Geogr. Fis. Dinam. Quat.* **2005**, *28*, 147-158.
37. Rudari, R.; Entekhabi, D.; Roth, G. Large-scale atmospheric patterns associated with mesoscale features leading to extreme precipitation events in Northwestern Italy. *Adv. Water Resour.* **2005**, *28*, 601-614. <https://doi.org/10.1016/j.advwatres.2004.10.017>.
38. Muñoz-Díaz, D.; Rodrigo, F.S. Influence of the El Niño-Southern Oscillation on the probability of dry and wet seasons in Spain. *Climate Res.* **2005**, *30*, 1-12. <https://doi.org/10.3354/cr030001>.
39. Paeth, H.; Hense, A. Mean versus extreme climate in the Mediterranean region and its sensitivity to future global warming conditions. *Meteorol. Z.* **2005**, *14*, 329-347. <https://doi.org/10.1127/0941-2948/2005/0036>.
40. Kostopoulou, E.; Jones, P.D. Assessment of climate extremes in the Eastern Mediterranean. *Meteorol. Atmos. Phys.* **2005**, *89*, 69-85. <https://doi.org/10.1007/s00703-005-0122-2>.
41. Delrieu, G.; Nicol, J.; Yates, E.; Kirstetter, P.-E.; Creutin, J.-D.; Anquetin, S.; Obled, C.; Saulnier, G.-M.; Ducrocq, V.; Gaume, E.; et al. The catastrophic flash-flood event of 8-9 September 2002 in the Gard Region, France: a first case study for the Cévennes-Vivarais Mediterranean Hydrometeorological Observatory. *J. Hydrometeorol.* **2005**, *6*, 34-52. <https://doi.org/10.1175/JHM-400.1>.

42. Alpert, P.; Price, C.; Krichak, S.O.; Ziv, B.; Saaroni, H.; Osetinsky, I.; Barkan, J.; Kishcha, P. Tropical tele-connections to the Mediterranean climate and weather. *Adv. Geosci.* **2005**, *2*, 157-160. <https://doi.org/10.5194/adgeo-2-157-2005>.
43. Tomassetti, B.; Coppola, E.; Verdecchia, M.; Visconti, G. Coupling a distributed grid based hydrological model and MM5 meteorological model for flooding alert mapping. *Adv. Geosci.* **2005**, *2*, 59-63. <https://doi.org/10.5194/adgeo-2-59-2005>.
44. Pozo-Vázquez, D.; Gámiz-Fortis, S.R.; Tovar-Pescador, J.; Esteban-Parra, M.J.; Castro-Díez, Y. El Niño–Southern Oscillation events and associated European winter precipitation anomalies. *Int. J. Climatol.* **2005**, *25*, 17-31. <https://doi.org/10.1002/joc.1097>.
45. Lenz, T.I.; Facelli, J.M. Correlations between environmental factors, the biomass of exotic annual grasses and the frequency of native perennial grasses. *Aust. J. Bot.* **2006**, *54*, 655-667. <https://doi.org/10.1071/BT05083>.
46. Cassardo, C.; Loglisci, N.; Paesano, G.; Rabuffetti, D.; Qian, M.W. The hydrological balance of the October 2000 flood in Piedmont, Italy: Quantitative analysis and simulation. *Phys. Geogr.* **2006**, *27*, 411-434. <https://doi.org/10.2747/0272-3646.27.5.411>.
47. Clarke, M.L.; Rendell, H.M. Hindcasting extreme events: The occurrence and expression of damaging floods and landslides in Southern Italy. *Land Degrad. Dev.* **2006**, *17*, 365-380. <https://doi.org/10.1002/ldr.743>.
48. Lebeaupin, C.; Ducrocq, V.; Giordani, H. Sensitivity of torrential rain events to the sea surface temperature based on high-resolution numerical forecasts. *J. Geophys. Res-Atmos.* **2006**, *111*. <https://doi.org/10.1029/2005JD006541>.
49. Utset, A.; Martínez-Cob, A.; Farré, I.; Caveró, J. Simulating the effects of extreme dry and wet years on the water use of flooding-irrigated maize in a Mediterranean landplane. *Agr. water manage.* **2006**, *85*, 77-84. <https://doi.org/10.1016/j.agwat.2006.03.010>.
50. Ramos, M.C. Soil water content and yield variability in vineyards of Mediterranean northeastern Spain affected by mechanization and climate variability. *Hydrol. Process.* **2006**, *20*, 2271-2283. <https://doi.org/10.1002/hyp.5990>.
51. Ramos, M.C.; Martínez-Casasnovas, J.A. Trends in precipitation concentration and extremes in the Mediterranean Penedes-Anoia region, NE Spain. *Climatic Change* **2006**, *74*, 457-474. <https://doi.org/10.1007/s10584-006-3458-9>.
52. Ramos, M.C.; Martínez-Casasnovas, J.A. Nutrient losses by runoff in vineyards of the Mediterranean Alt Penedès region (NE Spain). *Agr. Ecosyst. Environ.* **2006**, *113*, 356-363. <https://doi.org/10.1016/j.agee.2005.10.009>.
53. Houssos, E.E.; Bartzokas, A. Extreme precipitation events in NW Greece. *Adv. Geosci.* **2006**, *7*, 91-96. <https://doi.org/10.5194/adgeo-7-91-2006>.
54. Aronica, G.T.; Candela, A. Derivation of flood frequency curves in poorly gauged Mediterranean catchments using a simple stochastic hydrological rainfall-runoff model. *J. Hydrol.* **2007**, *347*, 132-142. <https://doi.org/10.1016/j.jhydrol.2007.09.011>.
55. Borga, M.; Boscolo, P.; Zanon, F.; Sangati, M. Hydrometeorological analysis of the 29 August 2003 flash flood in the Eastern Italian Alps. *J. Hydrometeorol.* **2007**, *8*, 1049-1067. <https://doi.org/10.1175/JHM593.1>.
56. Neppel, L.; Arnaud, P.; Lavabre, J. Extreme rainfall mapping. Comparison between two approaches in the Mediterranean area. *C. R. Geosci.* **2007**, *339*, 820-830. <https://doi.org/10.1016/j.crte.2007.09.013>.
57. Pujol, N.; Neppel, L.; Sabatier, R. Regional approach for trend detection in precipitation series of the French Mediterranean region. *C. R. Geosci.* **2007**, *339*, 651-658. <https://doi.org/10.1016/j.crte.2007.08.010>.
58. Funatsu, B.M.; Claud, C.; Chaboureaud, J.P. Potential of Advanced Microwave Sounding Unit to identify precipitating systems and associated upper-level features in the Mediterranean region: Case studies. *J. Geophys. Res-Atmos.* **2007**, *112*. <https://doi.org/10.1029/2006JD008297>.
59. Torrent, J.; Barberis, E.; Gil-Sotres, F. Agriculture as a source of phosphorus for eutrophication in southern Europe. *Soil Use Manage.* **2007**, *23*, 25-35. <https://doi.org/10.1111/j.1475-2743.2007.00122.x>.
60. Le Lay, M.; Saulnier, G.M. Exploring the signature of climate and landscape spatial variabilities in flash flood events: Case of the 8-9 September 2002 Cévennes-Vivarais catastrophic event. *Geophys. Res. Lett.* **2007**, *34*. <https://doi.org/10.1029/2007GL029746>.

61. Ramos, M.C.; Cots-Folch, R.; Martínez-Casasnovas, J.A. Sustainability of modern land terracing for vineyard plantation in a Mediterranean mountain environment - The case of the Priorat region (NE Spain). *Geomorphology* **2007**, *86*, 1-11. <https://doi.org/10.1016/j.geomorph.2006.08.004>.
62. Granier, A.; Reichstein, M.; Bréda, N.; Janssens, I.A.; Falge, E.; Ciais, P.; Grünwald, T.; Aubinet, M.; Berbigier, P.; Bernhofer, C.; et al. Evidence for soil water control on carbon and water dynamics in European forests during the extremely dry year: 2003. *Agr. Forest Meteorol.* **2007**, *143*, 123-145. <https://doi.org/10.1016/j.agrformet.2006.12.004>.
63. Medaglia, C.M.; Panegrossi, G.; Dietrich, S.; Mugnai, A.; Smith, E.A.; Tripoli, G.J. Modeling Microphysical Signatures of Extreme Events in the Western Mediterranean to Provide a Basis for Diagnosing Precipitation from Space. In *Measuring Precipitation From Space. Advances In Global Change Research*, 1st ed.; Levizzani, V., Bauer, P., Turk, F.J., Eds.; Springer: Dordrecht, The Netherlands, 2007; Volume 28, pp. 535-547. [https://doi.org/10.1007/978-1-4020-5835-6\\_42](https://doi.org/10.1007/978-1-4020-5835-6_42).
64. Zahar, Y.; Laborde, J.-P. Statistical modelling and cartography of extreme daily rainfall events in Tunisia. *Rev. Sci. Eau* **2007**, *20*, 409-424. <https://doi.org/10.7202/016914ar>.
65. Morin, E.; Harats, N.; Jacoby, Y.; Arbel, S.; Getker, M.; Arazi, A.; Grodek, T.; Ziv, B.; Dayan, U. Studying the extremes: hydrometeorological investigation of a flood-causing rainstorm over Israel. *Adv. Geosci.*, **2007**, *12*, 107-114. <https://doi.org/10.5194/adgeo-12-107-2007>.
66. Petrow, Th.; Merz, B.; Lindenschmidt, K.-E.; Thieken, A.H. Aspects of seasonality and flood generating circulation patterns in a mountainous catchment in south-eastern Germany. *Hydrol. Earth Syst. Sci.* **2007**, *11*, 1455-1468. <https://doi.org/10.5194/hess-11-1455-2007>.
67. Diodato, N.; Ceccarelli, M.; Bellocchi, G. Decadal and century-long changes in the reconstruction of erosive rainfall anomalies in a Mediterranean fluvial basin. *Earth Surf. Proc. Land.* **2008**, *33*, 2078-2093. <https://doi.org/10.1002/esp.1656>.
68. Märker, M.; Angeli, L.; Bottai, L.; Costantini, R.; Ferrari, R.; Innocenti, L.; Siciliano, G. Assessment of land degradation susceptibility by scenario analysis: A case study in Southern Tuscany, Italy. *Geomorphology* **2008**, *93*, 120-129. <https://doi.org/10.1016/j.geomorph.2006.12.020>.
69. Perona G.; Gabella M.; Casale R. Implementing a multiplatform precipitation experiment. In *Precipitation: Advances in Measurement, Estimation and Prediction*, 1st ed.; Michaelides, S., Ed.; Springer: Berlin, Heidelberg, 2008; pp. 515-531. [https://doi.org/10.1007/978-3-540-77655-0\\_20](https://doi.org/10.1007/978-3-540-77655-0_20).
70. De Girolamo, A.M.; Porto, A.L.; Abouabdillah, A.; De Luca, D.; Santese, G. Evaluation of Flow Regime in Mediterranean Streams Using Flashiness Index. In *Proceedings of the 21st Century Watershed Technology: Improving Water Quality and Environment*, Concepcion, Chile, 29 March 2008 - 3 April 2008; pp. 337-345. <https://doi.org/10.13031/2013.24316>.
71. Lebeaupin Brossier, C.; Ducrocq, V.; Giordani, H. Sensitivity of three Mediterranean heavy rain events to two different sea surface fluxes parameterizations in high-resolution numerical modeling. *J. Geophys. Res.-Atmos.* **2008**, *113*. <https://doi.org/10.1029/2007JD009613>.
72. Argence, S.; Lambert, D.; Richard, E.; Chaboureaud, J.-P.; Söhne, N. Impact of initial condition uncertainties on the predictability of heavy rainfall in the Mediterranean: A case study. *Q. J. Roy. Meteor. Soc.* **2008**, *134*, 1775-1788. <https://doi.org/10.1002/qj.314>.
73. Alpert, P.; Krichak, S.O.; Shafir, H.; Haim, D.; Osetinsky, I. Climatic trends to extremes employing regional modeling and statistical interpretation over the E. Mediterranean. *Global Planet. Change* **2008**, *63*, 163-170. <https://doi.org/10.1016/j.gloplacha.2008.03.003>.
74. Domínguez-Castro, F.; Santisteban, J.I.; Barriendos, M.; Mediavilla, R. Reconstruction of drought episodes for central Spain from rogation ceremonies recorded at the Toledo Cathedral from 1506 to 1900: A methodological approach. *Global Planet. Change* **2008**, *63*, 230-242. <https://doi.org/10.1016/j.gloplacha.2008.06.002>.
75. Vaselli, S.; Bertocci, I.; Maggi, E.; Benedetti-Cecchi, L. Effects of mean intensity and temporal variance of sediment scouring events on assemblages of rocky shores. *Mar. Ecol. Prog. Ser.* **2008**, *364*, 57-66. <https://doi.org/10.3354/meps07469>.
76. Amengual, A.; Romero, R.; Alonso, S. Hydrometeorological ensemble simulations of flood events over a small basin of Majorca Island, Spain. *Q. J. Roy. Meteor. Soc.* **2008**, *134*, 1221-1242. <https://doi.org/10.1002/qj.291>.
77. May, W. Potential future changes in the characteristics of daily precipitation in Europe simulated by the HIRHAM regional climate model. *Clim. Dyn.* **2008**, *30*, 581-603. <https://doi.org/10.1007/s00382-007-0309-y>.

78. Najib, K.; Jourde, H.; Pistre, S. A methodology for extreme groundwater surge predetermination in carbonate aquifers: Groundwater flood frequency analysis. *J. Hydrol.* **2008**, *352*, 1-15. <https://doi.org/10.1016/j.jhydrol.2007.11.035>.
79. Oikonomou, C.; Flocas, H.A.; Hatzaki, M.; Asimakopoulos, D.N.; Giannakopoulos, C. Future changes in the occurrence of extreme precipitation events in eastern Mediterranean. *Global NEST J.* **2008**, *10*, 255-262. <https://doi.org/10.30955/gnj.000531>.
80. Nuissier, O.; Ducrocq, V.; Ricard, D.; Lebeaupin, C.; Anquetin, S. A numerical study of three catastrophic precipitating events over southern France. I: Numerical framework and synoptic ingredients. *Q. J. Roy. Meteor. Soc.* **2008**, *134*, 111-130. <https://doi.org/10.1002/qj.200>.
81. de Dios Miranda, J.; Padilla, F.M.; Pugnaire, F.I. Response of a Mediterranean semiarid community to changing patterns of water supply. *Perspect. Plant Ecol. Evol. Syst.* **2009**, *11*, 255-266. <https://doi.org/10.1016/j.ppees.2009.05.001>.
82. de Dios Miranda, J.; Padilla, F.M.; Lázaro, R.; Pugnaire, F.I. Do changes in rainfall patterns affect semiarid annual plant communities?. *J. Veg. Sci.* **2009**, *20*, 269-276. <https://doi.org/10.1111/j.1654-1103.2009.05680.x>.
83. del Hoyo, A.; García-Marín, J.L.; Pedrola-Monfort, J. Temporal and spatial diversification of the African disjunct genus *Androcymbium* (Colchicaceae). *Mol. Phylogenet. Evol.* **2009**, *53*, 848-861. <https://doi.org/10.1016/j.ympev.2009.08.005>.
84. Diodato, N.; Bellocchi, G. Assessing and modelling changes in rainfall erosivity at different climate scales. *Earth Surf. Proc. Land.* **2009**, *34*, 969-980. <https://doi.org/10.1002/esp.1784>.
85. Molini, L.; Parodi, A.; Siccardi, F. Dealing with uncertainty: An analysis of the severe weather events over Italy in 2006. *Nat. Hazards Earth Syst. Sci.* **2009**, *9*, 1775-1787. <https://doi.org/10.5194/nhess-9-1775-2009>.
86. Costa, A.C.; Soares, A. Trends in extreme precipitation indices derived from a daily rainfall database for the South of Portugal. *Int. J. Climatol.* **2009**, *29*, 1956-1975. <https://doi.org/10.1002/joc.1834>.
87. Beguería, S.; Vicente-Serrano, S.M.; López-Moreno, J.I.; García-Ruiz, J.M. Annual and seasonal mapping of peak intensity, magnitude and duration of extreme precipitation events across a climatic gradient, northeast Spain. *Int. J. Climatol.* **2009**, *29*, 1759-1779. <https://doi.org/10.1002/joc.1808>.
88. Keesstra, S.D.; Bruijnzeel, L.A.; van Huissteden, J. Meso-scale catchment sediment budgets: combining field surveys and modeling in the Dragonja catchment, southwest Slovenia. *Earth Surf. Proc. Land.* **2009**, *34*, 1547-1561. <https://doi.org/10.1002/esp.1846>.
89. Lebeaupin Brossier, C.; Ducrocq, V.; Giordani, H. Two-way one-dimensional high-resolution air-sea coupled modelling applied to Mediterranean heavy rain events. *Q. J. Roy. Meteor. Soc.* **2009**, *135*, 187-204. <https://doi.org/10.1002/qj.338>.
90. Dimoyiannis, D. Seasonal soil aggregate stability variation in relation to rainfall and temperature under Mediterranean conditions. *Earth Surf. Proc. Land.* **2009**, *34*, 860-866. <https://doi.org/10.1002/esp.1785>.
91. Manus, C.; Anquetin, S.; Braud, I.; Vandervaere, J.-P.; Creutin, J.-D.; Viallet, P.; Gaume, E. A modeling approach to assess the hydrological response of small mediterranean catchments to the variability of soil characteristics in a context of extreme events. *Hydrol. Earth Syst. Sci.* **2009**, *13*, 79-97. <https://doi.org/10.5194/hess-13-79-2009>.
92. Ramos, M.C.; Martínez-Casasnovas, J.A. Impacts of annual precipitation extremes on soil and nutrient losses in vineyards of NE Spain. *Hydrol. Process.* **2009**, *23*, 224-235. <https://doi.org/10.1002/hyp.7130>.
93. Bellin, N.; van Wesemael, B.; Meerkerk, A.; Vanacker, V.; Barbera, G.G. Abandonment of soil and water conservation structures in Mediterranean ecosystems: a case study from south east Spain. *Catena* **2009**, *76*, 114-121. <https://doi.org/10.1016/j.catena.2008.10.002>.
94. Durão, R.; Pereira, M.J.; Costa, A.C.; Côrte-Real, J.M.; Soares, A. Indices of precipitation extremes in Southern Portugal—a geostatistical approach. *Nat. Hazards Earth Syst. Sci.* **2009**, *9*, 241-250. <https://doi.org/10.5194/nhess-9-241-2009>.
95. Ouassar, M.; Bruggeman, A.; Abdelli, F.; Mohtar, R.H.; Gabriels, D.; Cornelis, W.M. Modelling water-harvesting systems in the arid south of Tunisia using SWAT. *Hydrol. Earth Syst. Sci.* **2009**, *13*, 2003-2021. <https://doi.org/10.5194/hess-13-2003-2009>.
96. Soulis, K.X.; Valiantzas, J.D.; Dercas, N.; Londra, P.A. Investigation of the direct runoff generation mechanism for the analysis of the SCS-CN method applicability to a partial area experimental watershed. *Hydrol. Earth Syst. Sci.* **2009**, *13*, 605-615. <https://doi.org/10.5194/hess-13-605-2009>.

97. López-Moreno, J.I.; Beniston, M. Daily precipitation intensity projected for the 21st century: seasonal changes over the Pyrenees. *Theor. Appl. Climatol.* **2009**, *95*, 375-384. <https://doi.org/10.1007/s00704-008-0015-7>.
98. Diodato, N.; Bellocchi, G. Storminess and environmental changes in the Mediterranean Central Area. *Earth Interact.* **2010**, *14*, 1-16. <https://doi.org/10.1175/2010EI306.1>.
99. Tal, A. Desertification. In *The Turning Points of Environmental History*; Uekötter, F., Ed.; University of Pittsburgh Press: Pittsburgh, Pennsylvania, USA, 2010; pp. 146-161.
100. Llorens, P.; Poyatos, R.; Muzylo, A.; Rubio, C.; Latron, J.; Delgado, J.; Gallart, F. Hydrology in a Mediterranean mountain environment - The Vallcebre research basins (North Eastern Spain). III. Vegetation and water fluxes. *IAHS Publ.* **2010**, *336*, 186-191.
101. Alba-Sánchez, F.; Sabariego-Ruiz, S.; de la Guardia, C.D.; Nieto-Lugilde, D.; De Linares, C. Aerobiological behaviour of six anemophilous taxa in semi-arid environments of southern Europe (Almería, SE Spain). *J. Arid Environ.* **2010**, *74*, 1381-1391. <https://doi.org/10.1016/j.jaridenv.2010.06.005>.
102. Melendez-Pastor, I.; Navarro-Pedreño, J.; Koch, M.; Gómez, I.; Hernández, E.I. Land-cover phenologies and their relation to climatic variables in an anthropogenically impacted Mediterranean coastal area. *Remote Sens.* **2010**, *2*, 697-716. <https://doi.org/10.3390/rs2030697>.
103. Servat, E.; Demuth, S.; Dezetter, A.; Daniell, T. (Eds.) Global Change: Facing Risks and Threats to Water Resources. In Proceedings of the 6th World FRIEND Conference, Fez, Morocco, October 2010; IAHS Publ., IAHS Press: Centre for Ecology and Hydrology, Wallingford, UK, 2010; Volume 340, pp. 221-228.
104. Casaioli, M.; Lastoria, B.; Mariani, S.; Bussettini, M. Evaluating the improvements of the BOLAM model of the ISPRA Sistema Idro-Meteo-Mare on the December 2008 flood event in Rome. *Adv. Geosci.* **2010**, *25*, 135-141. <https://doi.org/10.5194/adgeo-25-135-2010>.
105. Cremonini, R.; Bechini, R. Heavy rainfall monitoring by polarimetric C-Band weather radars. *Water* **2010**, *2*, 838-848. <https://doi.org/10.3390/w2040838>.
106. Jebari, S.; Berndtsson, R.; Bahri, A.; Boufaroua, M. Spatial soil loss risk and reservoir siltation in semi-arid Tunisia. *Hydrolog. Sci. J.* **2010**, *55*, 121-137. <https://doi.org/10.1080/02626660903529049>.
107. Pereira, P.; Oliva, M.; Baltreñaite, E. Modelling extreme precipitation in hazardous mountainous areas. Contribution to landscape planning and environmental management. *J. Environ. Eng. Landsc.* **2010**, *18*, 329-342. <https://doi.org/10.3846/jeelem.2010.38>.
108. Trambly, Y.; Bouvier, C.; Crespy, A.; Marchandise, A. Improvement of flash flood modelling using spatial patterns of rainfall: A case study in southern France. In Proceedings of the Sixth World FRIEND Conference, Montpellier, France, 7-10 October 2014.
109. Marchi, L.; Borga, M.; Preciso, E.; Gaume, E. Characterisation of selected extreme flash floods in Europe and implications for flood risk management. *J. Hydrol.* **2010**, *394*, 118-133. <https://doi.org/10.1016/j.jhydrol.2010.07.017>.
110. Trambly, Y.; Saint-Hilaire, A.; Ouarda, T.B.M.J.; Moatar, F.; Hecht, B. Estimation of local extreme suspended sediment concentrations in California Rivers. *Sci. Total Environ.* **2010**, *408*, 4221-4229. <https://doi.org/10.1016/j.scitotenv.2010.05.001>.
111. Rodrigo, F.S. Changes in the probability of extreme daily precipitation observed from 1951 to 2002 in the Iberian Peninsula. *Int. J. Climatol.* **2020**, *30*, 1512-1525. <https://doi.org/10.1002/joc.1987>.
112. Durão, R.M.; Pereira, M.J.; Costa, A.C.; Delgado, J.; del Barrio, G.; Soares, A. Spatial-temporal dynamics of precipitation extremes in southern Portugal: a geostatistical assessment study. *Int. J. Climatol.* **2010**, *30*, 1526-1537. <https://doi.org/10.1002/joc.1999>.
113. Ramos, M.C.; Martínez-Casasnovas, J.A. Soil water balance in rainfed vineyards of the Penedès region (Northeastern Spain) affected by rainfall characteristics and land levelling: influence on grape yield. *Plant Soil* **2010**, *333*, 375-389. <https://doi.org/10.1007/s11104-010-0353-y>.
114. Polemio, M. Historical floods and a recent extreme rainfall event in the Murgia karstic environment (Southern Italy). *Z. Geomorphol.* **2010**, *54*, 195-219. <https://doi.org/10.1127/0372-8854/2010/0054S2-0011>.
115. Marques, M.J.; García-Muñoz, S.; Muñoz-Organero, G.; Bienes, R. Soil conservation beneath grass cover in hillside vineyards under Mediterranean climatic conditions (Madrid, Spain). *Land Degrad. Dev.* **2010**, *21*, 122-131. <https://doi.org/10.1002/ldr.915>.
116. Greenbaum, N.; Schwartz, U.; Bergman, N. Extreme floods and short-term hydroclimatological fluctuations in the hyper-arid Dead Sea region, Israel. *Global Planet. Change* **2010**, *70*, 125-137. <https://doi.org/10.1016/j.gloplacha.2009.11.013>.

117. Herrera, S.; Fita, L.; Fernández, J.; Gutiérrez, J.M. Evaluation of the mean and extreme precipitation regimes from the ENSEMBLES regional climate multimodel simulations over Spain. *J. Geophys. Res.-Atmos.* **2010**, *115*. <https://doi.org/10.1029/2010JD013936>.
118. Kendon, E.J.; Rowell, D.P.; Jones, R.G. Mechanisms and reliability of future projected changes in daily precipitation. *Clim. Dyn.* **2010**, *35*, 489-509. <https://doi.org/10.1007/s00382-009-0639-z>.
119. Hatzaki, M.; Flocas, H.A.; Oikonomou, C.; Giannakopoulos, C. Future changes in the relationship of precipitation intensity in Eastern Mediterranean with large scale circulation. *Adv. Geosci.* **2010**, *23*, 31-36. <https://doi.org/10.5194/adgeo-23-31-2010>.
120. Tymvios, F.; Savvidou, K.; Michaelides, S.C. Association of geopotential height patterns with heavy rainfall events in Cyprus. *Adv. Geosci.* **2010**, *23*, 73-78. <https://doi.org/10.5194/adgeo-23-73-2010>.
121. Bertini, G.; Amoriello, T.; Fabbio, G.; Piovosi, M. Forest growth and climate change: Evidences from the ICP-Forests intensive monitoring in Italy. *iForest* **2011**, *4*, 262-267. <https://doi.org/10.3832/ifer0596-004>.
122. Miranda, J.D.; Armas, C.; Padilla, F.M.; Pugnaire F.I. Climatic change and rainfall patterns: effects on semi-arid plant communities of the Iberian Southeast. *J. Arid Environ.* **2011**, *75*, 1302-1309. <https://doi.org/10.1016/j.jaridenv.2011.04.022>.
123. Cotrufo, M.F.; Alberti, G.; Inglema, I.; Marjanović, H.; Lecain, D.; Zaldei, A.; Peressotti, A.; Miglietta F. Decreased summer drought affects plant productivity and soil carbon dynamics in a Mediterranean woodland. *Biogeosciences* **2011**, *8*, 2729-2739. <https://doi.org/10.5194/bg-8-2729-2011>.
124. Matías, L.; Zamora, R.; Castro, J. Repercussions of Simulated Climate Change on the Diversity of Woody-Recruit Bank in a Mediterranean-type Ecosystem. *Ecosystems* **2011**, *14*, 672-682. <https://doi.org/10.1007/s10021-011-9437-7>.
125. Maxime, C.; Hendrik, D. Effects of climate on diameter growth of co-occurring *Fagus sylvatica* and *Abies alba* along an altitudinal gradient. *Trees* **2011**, *25*, 265-276. <https://doi.org/10.1007/s00468-010-0503-0>.
126. Linares, J.C.; Delgado-Huertas, A.; Carreira, J.A. Climatic trends and different drought adaptive capacity and vulnerability in a mixed *Abies pinsapo* - *Pinus halepensis* forest. *Climatic Change* **2011**, *105*, 67-90. <https://doi.org/10.1007/s10584-010-9878-6>.
127. Misson, L.; Degueldre, D.; Collin, C.; Rodriguez, R.; Rocheteau, A.; Ourcival, J.-M.; Rambal, S. Phenological responses to extreme droughts in a Mediterranean forest. *Glob. Change Biol.* **2011**, *17*, 1036-1048. <https://doi.org/10.1111/j.1365-2486.2010.02348.x>.
128. Cowling, R.M.; Mills, A.J. A preliminary assessment of rain throughfall beneath *Portulacaria afra* canopy in subtropical thicket and its implications for soil carbon stocks. *South African J. Bot.* **2011**, *77*, 236-240. <https://doi.org/10.1016/j.sajb.2010.06.004>.
129. Reiser, H.; Kutiel, H. Extreme Rainfall Events and Uncertainty in the Mediterranean Basin. In *Survival and Sustainability. Environmental Earth Sciences*, 1st ed; Gökçekus, H., Türker, U., LaMoreaux, J.W., Eds.; Springer: Berlin, Heidelberg, 2011; pp. 1439-1448. [https://doi.org/10.1007/978-3-540-95991-5\\_135](https://doi.org/10.1007/978-3-540-95991-5_135).
130. Gajić-Čapka, M.; Cindrić, K. Secular trends in indices of precipitation extremes in Croatia, 1901-2008. *Geofizika* **2011**, *28*, 293-312.
131. Machado, M.J.; Benito, G.; Barriendos, M.; Rodrigo, F.S. 500 years of rainfall variability and extreme hydrological events in southeastern Spain drylands. *J. Arid Environ.* **2011**, *75*, 1244-1253. <https://doi.org/10.1016/j.jaridenv.2011.02.002>.
132. Beguería, S.; Angulo-Martínez, M.; Vicente-Serrano, S.M.; López-Moreno, J.I.; El-Kenawy, A. Assessing trends in extreme precipitation events intensity and magnitude using non-stationary peaks-over-threshold analysis: a case study in northeast Spain from 1930 to 2006. *Int. J. Climatol.* **2011**, *31*, 2102-2114. <https://doi.org/10.1002/joc.2218>.
133. Godart, A.; Anquetin, S.; Leblois, E.; Creutin, J.D. The contribution of orographically driven banded precipitation to the rainfall climatology of a Mediterranean region. *J. Appl. Meteorol. Clim.* **2011**, *50*, 2235-2246. <https://doi.org/10.1175/JAMC-D-10-05016.1>.
134. Hidalgo-Muñoz, J.M.; Argüeso, D.; Gámiz-Fortis, S.R.; Esteban-Parra, M.J.; Castro-Díez, Y. Trends of extreme precipitation and associated synoptic patterns over the southern Iberian Peninsula. *J. Hydrol.* **2011**, *409*, 497-511. <https://doi.org/10.1016/j.jhydrol.2011.08.049>.
135. Roux, H.; Labat, D.; Garambois, P.A.; Maubourguet, M.M.; Chorda, J.; Dartus, D. A physically-based parsimonious hydrological model for flash floods in Mediterranean catchments. *Nat. Hazards Earth Syst. Sci.* **2011**, *11*, 2567-2582. <https://doi.org/10.5194/nhess-11-2567-2011>.

136. Diodato, N.; Bellocchi, G.; Romano, N.; Chirico, G.B. How the aggressiveness of rainfalls in the Mediterranean lands is enhanced by climate change. *Climatic Change* **2011**, *108*, 591-599. <https://doi.org/10.1007/s10584-011-0216-4>.
137. Tramblay, Y.; Neppel, L.; Carreau, J. Brief communication " Climatic covariates for the frequency analysis of heavy rainfall in the Mediterranean region". *Nat. Hazards Earth Syst. Sci.* **2011**, *11*, 2463-2468. <https://doi.org/10.5194/nhess-11-2463-2011>.
138. Hazenberg, P.; Yu, N.; Boudevillain, B.; Delrieu, G.; Uijlenhoet, R. Scaling of raindrop size distributions and classification of radar reflectivity - rain rate relations in intense Mediterranean precipitation. *J. Hydrol.* **2011**, *402*, 179-192. <https://doi.org/10.1016/j.jhydrol.2011.01.015>.
139. Pernar, N.; Holjević, D.; Bakšić, D.; Petraš, J.; Perković, I. The impact of technical and biological measures on soil and erosion dynamics in the research site of Abrami. *Croat. J. For. Eng.* **2011**, *32*, 99-110.
140. Beaulant, A.-L.; Joly, B.; Nuissier, O.; Somot, S.; Ducrocq, V.; Joly, A.; Sevault, F.; Deque, M.; Ricard, D. Statistico-dynamical downscaling for Mediterranean heavy precipitation. *Q. J. Roy. Meteor. Soc.* **2011**, *137*, 736-748. <https://doi.org/10.1002/qj.796>.
141. Grodek, T.; Lange, J.; Lekach, J.; Husary, S. Urban hydrology in mountainous middle eastern cities. *Hydrol. Earth Syst. Sci.* **2011**, *15*, 953-966. <https://doi.org/10.5194/hess-15-953-2011>.
142. Cantet, P.; Bacro, J.-N.; Arnaud, P. Using a rainfall stochastic generator to detect trends in extreme rainfall. *Stoch. Env. Res. Risk A.* **2011**, *25*, 429-441. <https://doi.org/10.1007/s00477-010-0440-x>.
143. Acero, F.J.; García, J.A.; Gallego, M.C. Peaks-over-threshold study of trends in extreme rainfall over the Iberian Peninsula. *J. Climate* **2011**, *24*, 1089-1105. <https://doi.org/10.1175/2010JCLI3627.1>.
144. Bodí, M.B.; Mataix-Solera, J.; Doerr, S.H.; Cerdà, A. The wettability of ash from burned vegetation and its relationship to Mediterranean plant species type, burn severity and total organic carbon content. *Geoderma* **2011**, *160*, 599-607. <https://doi.org/10.1016/j.geoderma.2010.11.009>.
145. Samuels, R.; Smiatek, G.; Krichak, S.; Kunstmann, H.; Alpert, P. Extreme value indicators in highly resolved climate change simulations for the Jordan River area. *J. Geophys. Res-Atmos.* **2011**, *116*. <https://doi.org/10.1029/2011JD016322>.
146. Gangoi, G.; de Cámara, E.S.; Alonso, L.; Navazo, M.; Gómez, M.C.; Iza, J.; García, J.A.; Ilardia, J.L.; Millán, M.M. Origin of the water vapor responsible for the European extreme rainfalls of August 2002: 1. High-resolution simulations and tracking of air masses. *J. Geophys. Res-Atmos.* **2011**, *116*. <https://doi.org/10.1029/2010JD015530>.
147. Reiser, H.; Kutiel, H. Rainfall uncertainty in the Mediterranean: time series, uncertainty, and extreme events. *Theor. Appl. Climatol.* **2011**, *104*, 357-375. <https://doi.org/10.1007/s00704-010-0345-0>.
148. Prior, J.; Kendon, M. The UK winter of 2009/2010 compared with severe winters of the last 100 years. *Weather* **2011**, *66*, 4-10. <https://doi.org/10.1002/wea.735>.
149. Matías, L.; Zamora, R.; Castro, J. Sporadic rainy events are more critical than increasing of drought intensity for woody species recruitment in a Mediterranean community. *Oecologia* **2012**, *169*, 833-844. <https://doi.org/10.1007/s00442-011-2234-3>.
150. Padedda, B.M.; Pulina, S.; Magni, P.; Sechi, N.; Lugliè, A. Phytoplankton dynamics in relation to environmental changes in a phytoplankton-dominated Mediterranean lagoon (Cabras Lagoon, Italy). *Adv. Oceanogr. Limnol.* **2012**, *3*, 147-169. <https://doi.org/10.1080/19475721.2012.716792>.
151. Barbi, A.; Monai, M.; Racca, R.; Rossa, A.M. Recurring features of extreme autumnall rainfall events on the Veneto coastal area. *Nat. Hazards Earth Syst. Sci.* **2012**, *12*, 2463-2477. <https://doi.org/10.5194/nhess-12-2463-2012>.
152. Tramblay, Y.; Neppel, L.; Carreau, J.; Sanchez-Gomez, E. Extreme value modelling of daily areal rainfall over Mediterranean catchments in a changing climate. *Hydrol. Process.* **2012**, *26*, 3934-3944. <https://doi.org/10.1002/hyp.8417>.
153. Jovanović, Z.; Stikić, R.; Bročić, Z.; Oljača, J. Climate change: Challenge for potato production in South-East Europe. In *Potatoes: Production, consumption and health benefits*; Caprara, C., Ed.; Nova Science Publishers, Inc.: New York, USA, 2012; pp. 37-66.
154. Delrieu, G.; Bonnifait, L.; Kirstetter, P.-E.; Boudevillain, B. Error model for radar quantitative precipitation estimates in a Mediterranean mountainous context. *IAHS Publ.* **2012**, *351*, 369-374.
155. Cayuela, H.; Besnard, A.; Bechet, A.; Devictor, V.; Olivier, A. Reproductive dynamics of three amphibian species in Mediterranean wetlands: the role of local precipitation and hydrological regimes. *Freshwater Biol.* **2012**, *57*, 2629-2640. <https://doi.org/10.1111/fwb.12034>.



156. Blain, H.-A.; Cuenca-Bescós, G.; Lozano-Fernández, I.; López-García, J.M.; Ollé, A.; Rosell, J.; Rodríguez, J. Investigating the Mid-Brunhes Event in the Spanish terrestrial sequence. *Geology* **2012**, *40*, 1051-1054. <https://doi.org/10.1130/G33427.1>.
157. Martínez, I.G.; Prat, C.; Ovalle, C.; del Pozo, A.; Stolpe, N.; Zagal, E. Subsoiling improves conservation tillage in cereal production of severely degraded Alfisols under Mediterranean climate. *Geoderma* **2012**, *189-190*, 10-17. <https://doi.org/10.1016/j.geoderma.2012.03.025>.
158. Lelieveld, J.; Hadjinicolaou, P.; Kostopoulou, E.; Chenoweth, J.; El Maayar, M.; Giannakopoulos, C.; Hannides, C.; Lange, M.A.; Tanarhte, M.; Tyrllis, E.; et al. Climate change and impacts in the Eastern Mediterranean and the Middle East. *Climatic Change* **2012**, *114*, 667-687. <https://doi.org/10.1007/s10584-012-0418-4>.
159. Rosa, R.; Marques, A.; Nunes, M.L. Impact of climate change in Mediterranean aquaculture. *Rev. Aquacult.* **2012**, *4*, 163-177. <https://doi.org/10.1111/j.1753-5131.2012.01071.x>.
160. Angulo-Martínez, M.; Beguería, S. Do atmospheric teleconnection patterns influence rainfall erosivity? A study of NAO, MO and WeMO in NE Spain, 1955-2006. *J. Hydrol.* **2012**, *450-451*, 168-179. <https://doi.org/10.1016/j.jhydrol.2012.04.063>.
161. Diodato, N.; Bellocchi, G. Decadal modelling of rainfall-runoff erosivity in the Euro-Mediterranean region using extreme precipitation indices. *Global Planet. Change* **2012**, *86-87*, 79-91. <https://doi.org/10.1016/j.gloplacha.2012.02.002>.
162. Lavaysse, C.; Vrac, M.; Drobinski, P.; Lengaigne, M.; Vischel, T. Statistical downscaling of the French Mediterranean climate: assessment for present and projection in an anthropogenic scenario. *Nat. Hazards Earth Syst. Sci.* **2012**, *12*, 651-670. <https://doi.org/10.5194/nhess-12-651-2012>.
163. Martínez Ibarra, E. A geographical approach to post-flood analysis: The extreme flood event of 12 October 2007 in Calpe (Spain). *Appl. Geogr.* **2012**, *32*, 490-500. <https://doi.org/10.1016/j.apgeog.2011.06.003>.
164. Ceresetti, D.; Anquetin, S.; Molinié, G.; Leblois, E.; Creutin, J.-D. Multiscale evaluation of extreme rainfall event predictions using severity diagrams. *Weather Forecast.* **2012**, *27*, 174-188. <https://doi.org/10.1175/WAF-D-11-00003.1>.
165. Anagnostopoulou, C.; Tolika, K. Extreme precipitation in Europe: statistical threshold selection based on climatological criteria. *Theor. Appl. Climatol.* **2012**, *107*, 479-489. <https://doi.org/10.1007/s00704-011-0487-8>.
166. Barbeta, A.; Ogaya, R.; Peñuelas, J. Dampening effects of long-term experimental drought on growth and mortality rates of a Holm oak forest. *Glob. Change Biol.* **2013**, *19*, 3133-3144. <https://doi.org/10.1111/gcb.12269>.
167. Coll, M.; Peñuelas, J.; Ninyerola, M.; Pons, X.; Carnicer, J. Multivariate effect gradients driving forest demographic responses in the Iberian Peninsula. *Forest Ecol. Manag.* **2013**, *303*, 195-209. <https://doi.org/10.1016/j.foreco.2013.04.010>.
168. Zhang, Y.; Susan Moran, M.; Nearing, M.A.; Ponce Campos, G.E.; Huete, A.R.; Buda, A.R.; Bosch, D.D.; Gunter, S.A.; Kitchen, S.G.; Henry McNab, W.; et al. Extreme precipitation patterns and reductions of terrestrial ecosystem production across biomes. *J. Geophys. Res-Bioge.* **2013**, *118*, 148-157. <https://doi.org/10.1029/2012JG002136>.
169. Arnone E.; Pumo D.; Viola F.; Noto L.V.; La Loggia G. Rainfall statistics changes in Sicily. *Hydrol. Earth Syst. Sci.* **2013**, *17*, 2449-2458. <https://doi.org/10.5194/hess-17-2449-2013>.
170. Swierczynski, T.; Lauterbach, S.; Dulski, P.; Delgado, J.; Merz, B.; Brauer, A. Mid-to late Holocene flood frequency changes in the northeastern Alps as recorded in varved sediments of Lake Mondsee (Upper Austria). *Quaternary Sci. Rev.* **2013**, *80*, 78-90. <https://doi.org/10.1016/j.quascirev.2013.08.018>.
171. Bernal, S.; von Schiller, D.; Sabater, F.; Martí, E. Hydrological extremes modulate nutrient dynamics in mediterranean climate streams across different spatial scales. *Hydrobiologia* **2013**, *719*, 31-42. <https://doi.org/10.1007/s10750-012-1246-2>.
172. Muñoz-Salinas, E.; Castillo, M.; Sanderson, D.; Kinnaird, T. Unraveling paraglacial activity on Sierra de Gredos, Central Spain: A study based on geomorphic markers, stratigraphy and OSL. *Catena* **2013**, *110*, 207-214. <https://doi.org/10.1016/j.catena.2013.06.018>.
173. Ramis, C.; Homar, V.; Amengual, A.; Romero, R.; Alonso, S. Daily precipitation records over mainland Spain and the Balearic Islands. *Nat. Hazards Earth Syst. Sci.* **2013**, *13*, 2483-2491. <https://doi.org/10.5194/nhess-13-2483-2013>.

174. Haktanir, T.; Bajabaa, S.; Masoud, M. Stochastic analyses of maximum daily rainfall series recorded at two stations across the Mediterranean Sea. *Arab. J. Geosci.* **2013**, *6*, 3943-3958. <https://doi.org/10.1007/s12517-012-0652-0>.
175. Garambois, P.A.; Roux, H.; Larnier, K.; Castaings, W.; Dartus, D. Characterization of process-oriented hydrologic model behavior with temporal sensitivity analysis for flash floods in Mediterranean catchments. *Hydrol. Earth Syst. Sci.* **2013**, *17*, 2305-2322. <https://doi.org/10.5194/hess-17-2305-2013>.
176. Tramblay, Y.; Neppel, L.; Carreau, J.; Najib, K. Non-stationary frequency analysis of heavy rainfall events in southern France. *Hydrolog. Sci. J.* **2013**, *58*, 280-294. <https://doi.org/10.1080/02626667.2012.754988>.
177. Kan, I.; Zeitouni, N. Impacts of Changes in Regional Rainfall-Distribution Patterns on Winter Agriculture in Israel. In *Water Policy in Israel. Global Issues in Water Policy*, 1st ed.; Becker, N., Ed.; Springer: Dordrecht, The Netherlands, 2013; Volume 4, pp. 193-207. [https://doi.org/10.1007/978-94-007-5911-4\\_13](https://doi.org/10.1007/978-94-007-5911-4_13).
178. Sivakumar, M.V.K.; Ruane, A.C.; Camacho, J. Climate Change in the West Asia and North Africa Region. In *Climate Change and Food Security in West Asia and North Africa*, 1st ed.; Sivakumar, M., Lal, R., Selvaraju, R., Hamdan, I., Eds.; Springer: Dordrecht, The Netherlands, 2013; pp. 3-26. [https://doi.org/10.1007/978-94-007-6751-5\\_1](https://doi.org/10.1007/978-94-007-6751-5_1).
179. Ozcan, O.; Bookhagen, B.; Musaoglu, N. Analyzing spatiotemporal patterns of extreme precipitation events in Southeastern Anatolia. *ISPRS Int. Arch. Photogramm.* **2013**, *XL-7/W2*, 195-200. <https://doi.org/10.5194/isprsarchives-XL-7-W2-195-2013>.
180. Groisman, P.Y.; Knight, R.W.; Zolina, O.G. Recent trends in regional and global intense precipitation patterns. *Clim. Vulnerability* **2013**, *5*, 25-55. <https://doi.org/10.1016/B978-0-12-384703-4.00501-3>.
181. Nissen, K.M.; Ulbrich, U.; Leckebusch, G.C. Vb cyclones and associated rainfall extremes over Central Europe under present day and climate change conditions. *Meteorol. Z.* **2013**, *22*, 649-660. <https://doi.org/10.1127/0941-2948/2013/0514>.
182. Brouwers, N.; Matusick, G.; Ruthrof, K.; Lyons, T.; Hardy, G. Landscape-scale assessment of tree crown dieback following extreme drought and heat in a Mediterranean eucalypt forest ecosystem. *Landscape Ecol.* **2013**, *28*, 69-80. <https://doi.org/10.1007/s10980-012-9815-3>.
183. Piccarreta, M.; Pasini, A.; Capolongo, D.; Lazzari, M. Changes in daily precipitation extremes in the Mediterranean from 1951 to 2010: the Basilicata region, southern Italy. *Int. J. Climatol.* **2013**, *33*, 3229-3248. <https://doi.org/10.1002/joc.3670>.
184. Pinto, J.G.; Ulbrich, S.; Parodi, A.; Rudari, R.; Boni, G.; Ulbrich, U. Identification and ranking of extraordinary rainfall events over Northwest Italy: The role of Atlantic moisture. *J. Geophys. Res-Atmos.* **2013**, *118*, 2085-2097. <https://doi.org/10.1002/jgrd.50179>.
185. Rebora N.; Molini L.; Casella E.; Comellas A.; Fiori E.; Pignone F.; Siccardi F.; Silvestro F.; Tanelli S.; Parodi A. Extreme rainfall in the mediterranean: What can we learn from observations. *J. Hydrometeorol.* **2013**, *14*, 906-922. <https://doi.org/10.1175/JHM-D-12-083.1>.
186. Saidi, H.; Ciampittiello, M.; Dresti, C.; Ghiglieri, G. The climatic characteristics of extreme precipitations for short-term intervals in the watershed of Lake Maggiore. *Theor. Appl. Climatol.* **2013**, *113*, 1-15. <https://doi.org/10.1007/s00704-012-0768-x>.
187. Vasey M.C., Parker V.T. Drivers of diversity in evergreen woody plant lineages experiencing canopy fire regimes in mediterranean-type climate regions. In *Plant Ecology and Evolution in Harsh Environments*; Rajakaruna, N., Boyd, R.S., Harris, T.B., Eds.; Nova Press: New York, USA, 2014; pp. 179-200.
188. Ruiz-Labourdette, D.; Génova, M.; Schmitz, M.F.; Urrutia, R.; Pineda, F.D. Summer rainfall variability in European Mediterranean mountains from the sixteenth to the twentieth century reconstructed from tree rings. *Int. J. Biometeorol.* **2014**, *58*, 1627-1639. <https://doi.org/10.1007/s00484-013-0766-4>.
189. Pilaš, I.; Medved, I.; Medak, J.; Medak, D. Response strategies of the main forest types to climatic anomalies across Croatian biogeographic regions inferred from FAPAR remote sensing data. *Forest Ecol. Manag.* **2014**, *326*, 58-78. <https://doi.org/10.1016/j.foreco.2014.04.012>.
190. Besson, C.K.; Lobo-do-Vale, R.; Rodrigues, M.L.; Almeida, P.; Herd, A.; Grant, O.M.; David, T.S.; Schmidt, M.; Otieno, D.; Keenan, T.F.; et al. Cork oak physiological responses to manipulated water availability in a Mediterranean woodland. *Agr. Forest Meteorol.* **2014**, *184*, 230-242. <https://doi.org/10.1016/j.agrformet.2013.10.004>.

191. de Dios Miranda, J.; Jorquera, M.J.; Pugnaire, F.I. Phenological and reproductive responses of a semiarid shrub to pulsed watering. *Plant Ecol.* **2014**, *215*, 769-777. <https://doi.org/10.1007/s11258-014-0354-7>.
192. Longepierre, D.; Mouillot, F.; Ouelhazi, B.; Ourcival, J.M.; Rocheteau, A.; Degueldre, D.; Rejeb, M.N. True water constraint under a rainfall interception experiment in a Mediterranean shrubland (Northern Tunisia): confronting discrete measurements with a plant-soil water budget model. *Plant Ecol.* **2014**, *215*, 779-794. <https://doi.org/10.1007/s11258-014-0349-4>.
193. Bartolini, G.; Grifoni, D.; Torrigiani, T.; Vallorani, R.; Meneguzzo, F.; Gozzini, B. Precipitation changes from two long-term hourly datasets in Tuscany, Italy. *Int. J. Climatol.* **2014**, *34*, 3977-3985. <https://doi.org/10.1002/joc.3956>.
194. Bartolini, G.; Messeri, A.; Grifoni, D.; Mannini, D.; Orlandini, S. Recent trends in seasonal and annual precipitation indices in Tuscany (Italy). *Theor. Appl. Climatol.* **2014**, *118*, 147-157. <https://doi.org/10.1007/s00704-013-1053-3>.
195. Diodato, N. Storminess Forecast Skills in Naples, Southern Italy. In *Storminess and Environmental Change. Advances in Natural and Technological Hazards Research*, 1st ed.; Diodato, N., Bellocchi, G., Eds.; Springer: Dordrecht, The Netherlands, 2014; Volume 39, pp. 269-280. [https://doi.org/10.1007/978-94-007-7948-8\\_18](https://doi.org/10.1007/978-94-007-7948-8_18).
196. Fiori, E.; Comellas, A.; Molini, L.; Rebora, N.; Siccardi, F.; Gochis, D.J.; Tanelli, S.; Parodi, A. Analysis and hindcast simulations of an extreme rainfall event in the Mediterranean area: The Genoa 2011 case. *Atmos. Res.* **2014**, *138*, 13-29. <https://doi.org/10.1016/j.atmosres.2013.10.007>.
197. Millán, M.M. Extreme hydrometeorological events and climate change predictions in Europe. *J. Hydrol.* **2014**, *518*, 206-224. <https://doi.org/10.1016/j.jhydrol.2013.12.041>.
198. Spinoni, J.; Naumann, G.; Carrao, H.; Barbosa, P.; Vogt, J. World drought frequency, duration, and severity for 1951–2010. *Int. J. Climatol.* **2014**, *34*, 2792-2804. <https://doi.org/10.1002/joc.3875>.
199. Rodríguez, R.; Navarro, X.; Casas, M.C.; Ribalaygua, J.; Russo, B.; Pouget, L.; Redaño, A. Influence of climate change on IDF curves for the metropolitan area of Barcelona (Spain). *Int. J. Climatol.* **2014**, *34*, 643-654. <https://doi.org/10.1002/joc.3712>.
200. Rosa, R.; Marques, A.; Nunes, M.L. Mediterranean Aquaculture in a Changing Climate. In *The Mediterranean Sea*, 1st ed.; Goffredo, S., Dubinsky, Z., Eds.; Springer: Dordrecht, 2014; pp. 605-616. [https://doi.org/10.1007/978-94-007-6704-1\\_37](https://doi.org/10.1007/978-94-007-6704-1_37).
201. Mariani, L.; Parisi, S.G. Extreme Rainfalls in the Mediterranean Area. *Adv. Nat. Technol. Hazard* **2014**, *39*, 17-37. [https://doi.org/10.1007/978-94-007-7948-8\\_2](https://doi.org/10.1007/978-94-007-7948-8_2).
202. Diodato, N.; Soriano, M. Rainfalls and Storm Erosivity. In *Storminess and Environmental Change*; Diodato, N., Bellocchi, G., Eds.; Springer: Dordrecht, The Netherlands, 2014; Volume 39, pp. 39-51. [https://doi.org/10.1007/978-94-007-7948-8\\_3](https://doi.org/10.1007/978-94-007-7948-8_3).
203. Borrell-Estupina, V.; Ladouche, B.; Malaterre, P.-O.; Ricci, S.; Caballero, Y.; Coustau, M.; Dorfliger, N.; Fleury, P.; Jay-Allemand, M.; Marechal, J.-C.; et al. Forecasting and mitigation of flooding in a Mediterranean karstic watershed. *IAHS Publ.* **2014**, *363*, 288-294.
204. Lereboullet, A.-L.; Beltrando, G.; Bardsley, D.K.; Rouvellac, E. The viticultural system and climate change: coping with long-term trends in temperature and rainfall in Roussillon, France. *Reg. Environ. Change* **2014**, *14*, 1951-1966. <https://doi.org/10.1007/s10113-013-0446-2>.
205. Jourde, H.; Lafare, A.; Mazzilli, N.; Belaud, G.; Neppel, L.; Dörfliger, N.; Cernesson, F. Flash flood mitigation as a positive consequence of anthropogenic forcing on the groundwater resource in a karst catchment. *Environ. Earth Sci.* **2014**, *71*, 573-583. <https://doi.org/10.1007/s12665-013-2678-3>.
206. Millares, A.; Polo, M.J.; Moñino, A.; Herrero, J.; Losada, M.A. Reservoir sedimentation and erosion processes in a snow-influenced basin, in Southern Spain. In *Reservoir Sedimentation*, 1st ed.; Schleiss, A.J., de Cesare, G., Franca M.J., Pfister, M., Eds.; Taylor and Francis Group, London, UK, 2014; pp. 91-98.
207. Castellarin, A.; Ceola, S.; Toth, E.; Montanari, A. Evolving Water Resources Systems: Understanding, Predicting and Managing Water-Society Interactions. In *Proceedings of the ICWRS-2014*, Bologna, Italy, June 2014. IAHS Publ., 2014.
208. Neppel, L.; Arnaud, P.; Borch, F.; Carreau, J.; Garavaglia, F.; Lang, M.; Paquet, E.; Renard, B.; Soubeyrou, J.-M.; Veyssière, J.-M. Comparison of extreme rainfall frequency analysis methods in France. *Houille Blanche* **2014**, *2*, 14-19. <https://doi.org/10.1051/lhb/2014011>.

209. Camarasa-Belmonte, A.M.; Soriano, J. Empirical study of extreme rainfall intensity in a semi-arid environment at different time scales. *J. Arid Environ.* **2014**, *100-101*, 63-71. <https://doi.org/10.1016/j.jaridenv.2013.10.008>.
210. Parisi, S.G.; Mariani, L.; Cola, G. Extreme rainfall in the Lombardy region. *Ita. J. Agrometeorol.* **2014**, *19*, 19-28.
211. Cammalleri, C.; Micale, F.; Vogt, J. On the value of combining different modelled soil moisture products for European drought monitoring. *J. Hydrol.* **2015**, *525*, 547-558. <https://doi.org/10.1016/j.jhydrol.2015.04.021>.
212. Costa-e-Silva, F.; Correia, A.C.; Piayda, A.; Dubbert, M.; Rebmann, C.; Cuntz, M.; Werner, C.; David, J.S.; Pereira, J.S. Effects of an extremely dry winter on net ecosystem carbon exchange and tree phenology at a cork oak woodland. *Agr. Forest Meteorol.* **2015**, *204*, 48-57. <https://doi.org/10.1016/j.agrformet.2015.01.017>.
213. Liu, D.; Ogaya, R.; Barbeta, A.; Yang, X.; Peñuelas, J. Contrasting impacts of continuous moderate drought and episodic severe droughts on the aboveground-biomass increment and litterfall of three coexisting Mediterranean woody species. *Glob. Change Biol.* **2015**, *21*, 4196-4209. <https://doi.org/10.1111/gcb.13029>.
214. Lempereur, M.; Martin-Stpaul, N.K.; Damesin, C.; Joffre, R.; Ourcival, J.-M.; Rocheteau, A.; Rambal, S. Growth duration is a better predictor of stem increment than carbon supply in a Mediterranean oak forest: implications for assessing forest productivity under climate change. *New Phytol.* **2015**, *207*, 579-590. <https://doi.org/10.1111/nph.13400>.
215. Dumont, B.; Andueza, D.; Niderkorn, V.; Lüscher, A.; Porqueddu, C.; Picon-Cochard, C. A meta-analysis of climate change effects on forage quality in grasslands: specificities of mountain and Mediterranean areas. *Grass Forage Sci.* **2015**, *70*, 239-254. <https://doi.org/10.1111/gfs.12169>.
216. Calmanti, S.; Dell'Aquila, A.; Maimone, F.; Pelino, V. Evaluation of climate patterns in a regional climate model over Italy using long-term records from SYNOP weather stations and cluster analysis. *Climate Res.* **2015**, *62*, 173-188. <https://doi.org/10.3354/cr01256>.
217. Candela, A.; Aronica, G.T. Derivation of rainfall thresholds for pluvial flood risk warning in urbanised areas. XXXV Convegno Nazionale di Idraulica e Costruzioni Idrauliche. Bologna, Italy 14-16 September 2016. IDRA16: Bologna, Italy 14-16 September 2016.
218. Cevasco, A.; Diodato, N.; Revellino, P.; Fiorillo, F.; Grelle, G.; Guadagno, F.M. Storminess and geo-hydrological events affecting small coastal basins in a terraced Mediterranean environment. *Sci. Total Environ.* **2015**, *532*, 208-219. <https://doi.org/10.1016/j.scitotenv.2015.06.017>.
219. Faccini, F.; Luino, F.; Sacchini, A.; Turconi, L. The 4th October 2010 flash flood event in Genoa Sestri Ponente (Liguria, Italy). *Disaster Adv.* **2015**, *8*, 1-14.
220. Hernandez, C.; Keribin, C.; Drobinski, P.; Turquety, S. Statistical modelling of wildfire size and intensity: a step toward meteorological forecasting of summer extreme fire risk. *Ann. Geophys.* **2015**, *33*, 1495-1506. <https://doi.org/10.5194/angeo-33-1495-2015>.
221. Marra, F.; Morin, E. Use of radar QPE for the derivation of Intensity-Duration-Frequency curves in a range of climatic regimes. *J. Hydrol.* **2015**, *531*, 427-440. <https://doi.org/10.1016/j.jhydrol.2015.08.064>.
222. Dayan, U.; Nissen, K.; Ulbrich, U. Atmospheric conditions inducing extreme precipitation over the eastern and western Mediterranean. *Nat. Hazards Earth Syst. Sci.* **2015**, *15*, 2525-2544. <https://doi.org/10.5194/nhess-15-2525-2015>.
223. Shellenbarger, G.G.; Downing-Kunz, M.A.; Schoellhamer, D.H. Suspended-sediment dynamics in the tidal reach of a San Francisco Bay tributary. *Ocean Dynam.* **2015**, *65*, 1477-1488. <https://doi.org/10.1007/s10236-015-0876-0>.
224. Gangoiti, G.; de Cámara, E.S.; Gómez-Domenech, I.; Alonso, L.; Navazo, M.; Iza, J.; García, J.A.; Millán, M.M. Re-evaluation of moisture sources for the August 2002 extreme rainfall episode in central Europe: Evaporation from falling precipitation included in a mesoscale modeling system. *J. Hydrol.* **2015**, *529*, 696-710. <https://doi.org/10.1016/j.jhydrol.2015.08.055>.
225. Camarasa-Belmonte, A.M.; Butrón, D. Estimation of flood risk thresholds in Mediterranean areas using rainfall indicators: case study of Valencian Region (Spain). *Nat. Hazards* **2015**, *78*, 1243-1266. <https://doi.org/10.1007/s11069-015-1769-8>.
226. Burić, D.; Luković, J.; Bajat, B.; Kilibarda, M.; Živković, N. Recent trends in daily rainfall extremes over Montenegro (1951-2010). *Nat. Hazards Earth Syst. Sci.* **2015**, *15*, 2069-2077. <https://doi.org/10.5194/nhess-15-2069-2015>.

227. Iordanidou, V.; Koutroulis, A.G.; Tsanis, I.K. Mediterranean cyclone characteristics related to precipitation occurrence in Crete, Greece. *Nat. Hazards Earth Syst. Sci.* **2015**, *15*, 1807-1819. <https://doi.org/10.5194/nhess-15-1807-2015>.
228. Shakesby, R.A.; Bento, C.P.M.; Ferreira, C.S.S.; Ferreira, A.J.D.; Stoof, C.R.; Urbanek, E.; Walsh, R.P.D. Impacts of prescribed fire on soil loss and soil quality: an assessment based on an experimentally-burned catchment in central Portugal. *Catena* **2015**, *128*, 278-293. <https://doi.org/10.1016/j.catena.2013.03.012>.
229. Li, C.; Sun, J. Role of the subtropical westerly jet waveguide in a southern China heavy rainstorm in December 2013. *Adv. Atmos. Sci.* **2015**, *32*, 601-612. <https://doi.org/10.1007/s00376-014-4099-y>.
230. Ries, F.; Lange, J.; Schmidt, S.; Puhlmann, H.; Sauter, M. Recharge estimation and soil moisture dynamics in a Mediterranean, semi-arid karst region. *Hydrol. Earth Syst. Sci.* **2015**, *19*, 1439-1456. <https://doi.org/10.5194/hess-19-1439-2015>.
231. Lavers, D.A.; Villarini, G. The contribution of atmospheric rivers to precipitation in Europe and the United States. *J. Hydrol.* **2015**, *522*, 382-390. <https://doi.org/10.1016/j.jhydrol.2014.12.010>.
232. Paxian, A.; Hertig, E.; Seubert, S.; Vogt, G.; Jacobeit, J.; Paeth, H. Present-day and future Mediterranean precipitation extremes assessed by different statistical approaches. *Clim. Dyn.* **2015**, *44*, 845-860. <https://doi.org/10.1007/s00382-014-2428-6>.
233. Lightbody, S.W.; Smith, J.T.; Hermida, E. Climate change and slope failures in Gibraltar. In *Geotechnical Engineering for Infrastructure and Development*, Proceedings of the XVI European Conference on Soil Mechanics and Geotechnical Engineering, Edinburgh, UK, 13-17 September 2015; ICE Publishing, Edinburgh, UK, 2015; pp. 1891-1896.
234. Borrell Estupina, V.; Raynaud, F.; Bourgeois, N.; Kong-A-Siou, L.; Collet, L.; Haziza, E.; Servat, E. Operational tools to help stakeholders to protect and alert municipalities facing uncertainties and changes in karst flash floods. *IAHS Publ.* **2015**, *370*, 201-208. <https://doi.org/10.5194/piahs-370-201-2015>.
235. Taibi, S.; Meddi, M.; Mahé, G. Evolution of extreme rainfall in the Cheliff basin (Algeria) over the past 40 years, 1971-2010. *IAHS Publ.* **2015**, *369*, 175-180. <https://doi.org/10.5194/piahs-369-175-2015>.
236. Hendy, I.L.; Napier, T.J.; Schimmelmann, A. From extreme rainfall to drought: 250 years of annually resolved sediment deposition in Santa Barbara Basin, California. *Quatern. Int.* **2015**, *387*, 3-12. <https://doi.org/10.1016/j.quaint.2015.01.026>.
237. Ohana-Levi, N.; Karnieli, A.; Egozi, R.; Givati, A.; Peeters, A. Modeling the effects of land-cover change on rainfall-runoff relationships in a semiarid, eastern mediterranean watershed. *Adv Meteorol.* **2015**, *2015*. <https://doi.org/10.1155/2015/838070>.
238. Andrys, J.; Lyons, T.J.; Kala, J. Multidecadal evaluation of WRF downscaling capabilities over Western Australia in simulating rainfall and temperature extremes. *J. Appl. Meteorol. Clim.* **2015**, *54*, 370-394. <https://doi.org/10.1175/JAMC-D-14-0212.1>.
239. Soubeyroux, J.M.; Veyssiere, J.M.; Gouget, V.; Neppel, L.; Trambly, Y.; Carreau, J. Evolution of extreme rainfall in France with a changing climate. *Houille Blanche* **2015**, *101*, 27-33. <https://doi.org/10.1051/lhb/2015004>.
240. Kumar, K.N.; Entekhabi, D.; Molini, A. Hydrological extremes in hyperarid regions: A diagnostic characterization of intense precipitation over the Central Arabian Peninsula. *J. Geophys. Res-Atmos.* **2015**, *120*, 1637-1650. <https://doi.org/10.1002/2014JD022341>.
241. Alfieri, L.; Thielen, J. A European precipitation index for extreme rain-storm and flash flood early warning. *Meteorol. Appl.* **2015**, *22*, 3-13. <https://doi.org/10.1002/met.1328>.
242. Sánchez-Canales, M.; López-Benito, A.; Acuña, V.; Ziv, G.; Hamel, P.; Chaplin-Kramer, R.; Elorza, F.J. Sensitivity analysis of a sediment dynamics model applied in a Mediterranean river basin: Global change and management implications. *Sci. Total Environ.* **2015**, *502*, 602-610. <https://doi.org/10.1016/j.scitotenv.2014.09.074>.
243. Maugeri, M.; Brunetti, M.; Garzoglio, M.; Simolo, C. High-resolution analysis of 1 day extreme precipitation in Sicily. *Nat. Hazards Earth Syst. Sci.* **2015**, *15*, 2347-2358. <https://doi.org/10.5194/nhess-15-2347-2015>.
244. Palese, A.M.; Ringersma, J.; Baartman, J.E.M.; Peters, P.; Xiloyannis, C. Runoff and sediment yield of tilled and spontaneous grass-covered olive groves grown on sloping land. *Soil Res.* **2015**, *53*, 542-552. <https://doi.org/10.1071/SR14350>.

245. Chelli, S.; Canullo, R.; Campetella, G.; Schmitt, A.O.; Bartha, S.; Cervellini, M.; Wellstein, C. The response of sub-Mediterranean grasslands to rainfall variation is influenced by early season precipitation. *Appl. Veg. Sci.* **2016**, *19*, 611-619. <https://doi.org/10.1111/avsc.12247>.
246. Muñoz, A.A.; González-Reyes, A.; Lara, A.; Sauchyn, D.; Christie, D.; Puchi, P.; Urrutia-Jalabert, R.; Toledo-Guerrero, I.; Aguilera-Betti, I.; Mundo, I.; et al. Streamflow variability in the Chilean Temperate-Mediterranean climate transition (35°S-42°S) during the last 400 years inferred from tree-ring records. *Clim. Dyn.* **2016**, *47*, 4051-4066. <https://doi.org/10.1007/s00382-016-3068-9>.
247. Comino, J.R.; Sinoga, J.D.R.; Senciales González, J.M.; Guerra-Merchán, A.; Seeger, M.; Ries, J.B. High variability of soil erosion and hydrological processes in Mediterranean hillslope vineyards (Montes de Málaga, Spain). *Catena* **2016**, *145*, 274-284. <https://doi.org/10.1016/j.catena.2016.06.012>.
248. Rodríguez-Lloveras, X.; Buytaert, W.; Benito, G. Land use can offset climate change induced increases in erosion in Mediterranean watersheds. *Catena* **2016**, *143*, 244-255. <https://doi.org/10.1016/j.catena.2016.04.012>.
249. Aguilar, C.; Guzmán, E.; Burguet, M.; Polo, M.J.; Taguas, E.V. Hydrological Response of a Semiarid Olive Orchard Microcatchment Under Theoretical Climate Change Scenarios. *Soil Sci.* **2016**, *181*, 283-292. <https://doi.org/10.1097/SS.0000000000000167>.
250. García-Palacios, P.; Prieto, I.; Ourcival, J.-M.; Hättenschwiler, S. Disentangling the litter quality and soil microbial contribution to leaf and fine root litter decomposition responses to reduced rainfall. *Ecosystems* **2016**, *19*, 490-503. <https://doi.org/10.1007/s10021-015-9946-x>.
251. Piras, M.; Mascaro, G.; Deidda, R.; Vivoni, E.R. Impacts of climate change on precipitation and discharge extremes through the use of statistical downscaling approaches in a Mediterranean basin. *Sci. Total Environ.* **2016**, *543*, 952-964. <https://doi.org/10.1016/j.scitotenv.2015.06.088>.
252. Ramos, M.C. Soil losses in rainfed Mediterranean vineyards under climate change scenarios. The effects of drainage terraces. *Agriculture* **2016**, *1*, 124-143. <https://doi.org/10.3934/agrfood.2016.2.124>.
253. Joët, T.; Ourcival, J.-M.; Capelli, M.; Dussert, S.; Morin, X. Explanatory ecological factors for the persistence of desiccation-sensitive seeds in transient soil seed banks: *Quercus ilex* as a case study. *Ann. Bot.* **2016**, *117*, 165-176. <https://doi.org/10.1093/aob/mcv139>.
254. Aceto, L.; Caloiero, T.; Pasqua, A.A.; Petrucci, O. Analysis of damaging hydrogeological events in a Mediterranean region (Calabria). *J. Hydrol.* **2016**, *541*, 510-522. <https://doi.org/10.1016/j.jhydrol.2015.12.041>.
255. Amponsah, W.; Marchi, L.; Zoccatelli, D.; Boni, G.; Cavalli, M.; Comiti, F.; Crema, S.; Lucía, A.; Marra, F.; Borga, M. Hydrometeorological characterization of a flash flood associated with major geomorphic effects: Assessment of peak discharge uncertainties and analysis of the runoff response. *J. Hydrometeorol.* **2016**, *17*, 3063-3077. <https://doi.org/10.1175/JHM-D-16-0081.1>.
256. Corella, J.P.; Valero-Garcés, B.L.; Vicente-Serrano, S.M.; Brauer, A.; Benito, G. Three millennia of heavy rainfalls in Western Mediterranean: frequency, seasonality and atmospheric drivers. *Sci. Rep.-UK* **2016**, *6*, 38206. <https://doi.org/10.1038/srep38206>.
257. Hlavčová, K.; Kohnová, S.; Borga, M.; Horvát, O.; Štastný, P.; Pekárová, P.; Majerčáková, O.; Danáčová, Z. Post-event analysis and flash flood hydrology in Slovakia. *J. Hydrol. Hydromech.* **2016**, *64*, 304-315. <https://doi.org/10.1515/johh-2016-0041>.
258. Braud, I.; Ayrat, P.A.; Bouvier, C.; Branger, F.; Delrieu, G.; Dramais, G.; Le Coz, J.; Leblois, E.; Nord, G.; Vandervaere, J.P. Advances in flash floods understanding and modelling derived from the FloodScale project in South-East France. In Proceedings of the 3rd European Conference on Flood Risk Management, Innovation, Implementation, Integration (FLOODrisk 2016), Lyon, France, 18-20 October 2016. <https://doi.org/10.1051/e3sconf/20160704005>.
259. Llasat, M.C.; Marcos, R.; Turco, M.; Gilabert, J.; Llasat-Botija, M. Trends in flash flood events versus convective precipitation in the Mediterranean region: The case of Catalonia. *J. Hydrol.* **2016**, *541*, 24-37. <https://doi.org/10.1016/j.jhydrol.2016.05.040>.
260. Boudou, M.; Lang, M.; Vinet, F.; Cœur, D. Comparative hazard analysis of processes leading to remarkable flash floods (France, 1930-1999). *J. Hydrol.* **2016**, *541*, 533-552. <https://doi.org/10.1016/j.jhydrol.2016.05.032>.
261. Dolšák, D.; Bezak, N.; Šraj, M. Temporal characteristics of rainfall events under three climate types in Slovenia. *J. Hydrol.* **2016**, *541*, 1395-1405. <https://doi.org/10.1016/j.jhydrol.2016.08.047>.
262. Camarasa-Belmonte, A.M. Flash floods in Mediterranean ephemeral streams in Valencia Region (Spain). *J. Hydrol.* **2016**, *541*, 99-115. <https://doi.org/10.1016/j.jhydrol.2016.03.019>.

263. Fiori, E.; Lagasio, M.; Parodi, A.; Procopio, R.; Smorgonskiy, A.; Rachidi, F.; Diendorfer, G. Implementation and performance analysis of the Lightning Potential Index as a forecasting tool. In Proceedings of the 2016 33rd International Conference on Lightning Protection (ICLP), Estoril, Portugal, 25-30 September 2016. <https://doi.org/10.1109/ICLP.2016.7791514>.
264. Blanchet, J.; Ceresetti, D.; Molinié, G.; Creutin, J.-D. A regional GEV scale-invariant framework for Intensity-Duration-Frequency analysis. *J. Hydrol.* **2016**, *540*, 82-95. <https://doi.org/10.1016/j.jhydrol.2016.06.007>.
265. Rodríguez-Fonseca, B.; Suárez-Moreno, R.; Ayarzagüena, B.; López-Parages, J.; Gómara, I.; Villamayor, J.; Mohino, E.; Losada, T.; Castaño-Tierno, A. A review of ENSO influence on the North Atlantic. A non-stationary signal. *Atmosphere* **2016**, *7*, 87. <https://doi.org/10.3390/atmos7070087>.
266. Orth, R.; Zscheischler, J.; Seneviratne, S.I. Record dry summer in 2015 challenges precipitation projections in Central Europe. *Sci. Rep.-UK* **2016**, *6*, 28334. <https://doi.org/10.1038/srep28334>.
267. Stadtherr, L.; Coumou, D.; Petoukhov, V.; Petri, S.; Rahmstorf, S. Record Balkan floods of 2014 linked to planetary wave resonance. *Sci. Adv.* **2016**, *2*, e1501428. <https://doi.org/10.1126/sciadv.1501428>.
268. Sousa, P.M.; Barriopedro, D.; Trigo, R.M.; Ramos, A.M.; Nieto, R.; Gimeno, L.; Turkman, K.F.; Liberato, M.L.R. Impact of Euro-Atlantic blocking patterns in Iberia precipitation using a novel high resolution dataset. *Clim. Dyn.* **2016**, *46*, 2573-2591. <https://doi.org/10.1007/s00382-015-2718-7>.
269. Busuioc, A.; Birsan, M.-V.; Carbutaru, D.; Baciuc, M.; Orzan, A. Changes in the large-scale thermodynamic instability and connection with rain shower frequency over Romania: verification of the Clausius-Clapeyron scaling. *Int. J. Climatol.* **2016**, *36*, 2015-2034. <https://doi.org/10.1002/joc.4477>.
270. Bennett, B.; Lambert, M.; Thyer, M.; Bates, B.C.; Leonard, M. Estimating extreme spatial rainfall intensities. *J. Hydrol. Eng.* **2016**, *21*, 04015074. [https://doi.org/10.1061/\(ASCE\)HE.1943-5584.0001316](https://doi.org/10.1061/(ASCE)HE.1943-5584.0001316).
271. Wu, H.-T.J.; Lau, W.K.-M. Detecting climate signals in precipitation extremes from TRMM (1998-2013) - Increasing contrast between wet and dry extremes during the "global warming hiatus". *Geophys. Res. Lett.* **2016**, *43*, 1340-1348. <https://doi.org/10.1002/2015GL067371>.
272. Li, J.; Thyer, M.; Lambert, M.; Kuzera, G.; Metcalfe, A. Incorporating seasonality into event-based joint probability methods for predicting flood frequency: A hybrid causative event approach. *J. Hydrol.* **2016**, *533*, 40-52. <https://doi.org/10.1016/j.jhydrol.2015.11.038>.
273. Kallos, G.; Kushta, J.; Bartsotas, N.; Patlakas, P.; Astitha, M.; Qahtani, J.A. The Role of Aerosols in Low and Upper Atmospheric Layers Condensation. In *Air Pollution Modeling and its Application XXIV*, 1st ed.; Steyn, D., Chaumerliac, N., Eds.; Springer, Cham: Switzerland, 2016; pp. 17-22. [https://doi.org/10.1007/978-3-319-24478-5\\_3](https://doi.org/10.1007/978-3-319-24478-5_3).
274. Slini, T.; Papakostas, K.T. 30 Years Air Temperature Data Analysis in Athens and Thessaloniki, Greece. In *Energy, Transportation and Global Warming. Green Energy and Technology*, 1st ed.; Grammelis, P., Ed.; Springer, Cham: Switzerland, 2016; pp 21-33. [https://doi.org/10.1007/978-3-319-30127-3\\_3](https://doi.org/10.1007/978-3-319-30127-3_3).
275. Krichak, S.O.; Feldstein, S.B.; Alpert, P.; Gualdi, S.; Scoccimarro, E.; Yano, J.I. Discussing the role of tropical and subtropical moisture sources in cold season extreme precipitation events in the Mediterranean region from a climate change perspective. *Nat. Hazards Earth Syst. Sci.* **2016**, *16*, 269-285. <https://doi.org/10.5194/nhess-16-269-2016>.
276. Papalaskaris, T.; Panagiotidis, T.; Papadopoulos, S.; Pantrakis, A. Stochastic generation of daily rainfall, in Kavala city station, North-Eastern Greece. *Procedia Engineer.* **2016**, *162*, 162-171. <https://doi.org/10.1016/j.proeng.2016.11.032>.
277. Diodato, N.; Bellocchi, G.; Romano, N.; Guadagno, F.M. Modelling the Rainfall Erosivity of the Rhone Region (Southeastern France) Associated with Climate Variability and Storminess. *Adv. Meteorol.* **2016**, *2016*, 7626505. <https://doi.org/10.1155/2016/7626505>.
278. Longobardi, A.; Diodato, N.; Mobilia, M. Historical storminess and hydro-geological hazard temporal evolution in the solofrana river basin - Southern Italy. *Water* **2016**, *8*, 398. <https://doi.org/10.3390/w8090398>.
279. Ravazzani, G.; Amengual, A.; Ceppi, A.; Homar, V.; Romero, R.; Lombardi, G.; Mancini, M. Potentialities of ensemble strategies for flood forecasting over the Milano urban area. *J. Hydrol.* **2016**, *539*, 237-253. <https://doi.org/10.1016/j.jhydrol.2016.05.023>.
280. Rysman, J.-F.; Lemaître, Y.; Moreau, E. Spatial and temporal variability of rainfall in the Alps-Mediterranean Euroregion. *J. Appl. Meteorol. Clim.* **2016**, *55*, 655-671. <https://doi.org/10.1175/JAMC-D-15-0095.1>.

281. Kreyling, J.; Dengler, J.; Walter, J.; Velez, N.; Ugurlu, E.; Sopotlieva, D.; Ransijn, J.; Picon-Cochard, C.; Nijs, I.; Hernandez, P.; et al. Species richness effects on grassland recovery from drought depend on community productivity in a multisite experiment. *Ecol. Lett.* **2017**, *20*, 1405-1413. <https://doi.org/10.1111/ele.12848>.
282. Cerdà, A.; Keesstra, S.D.; Comino, J.R.; Novara, A.; Pereira, P.; Brevik, E.; Giménez-Morera, A.; Fernández-Raga, M.; Pulido, M.; di Prima, S.; et al. Runoff initiation, soil detachment and connectivity are enhanced as a consequence of vineyards plantations. *J. Environ. Manage.* **2017**, *202*, 268-275. <https://doi.org/10.1016/j.jenvman.2017.07.036>.
283. Asadi, S.S.; Kumar, M.; Kumar, N.; Rajyalakshmi, K. Estimation of runoff for agricultural utilization using geoinformatics: A model study from Telangana state. *Int. J. Civil Eng. Technol.* **2017**, *8*, 472-483.
284. Liu, D.; Estiarte, M.; Ogaya, R.; Yang, X.; Peñuelas, J. Shift in community structure in an early-successional Mediterranean shrubland driven by long-term experimental warming and drought and natural extreme droughts. *Glob. Change Biol.* **2017**, *23*, 4267-4279. <https://doi.org/10.1111/gcb.13763>.
285. Kim, H.N.; Jin, H.Y.; Kwak, M.J.; Khaine, I.; You, H.N.; Lee, T.Y.; Ahn, T.H.; Woo, S.Y. Why does *Quercus suber* species decline in Mediterranean areas?. *J. Asia-Pac. Biodivers.* **2017**, *10*, 337-341. <https://doi.org/10.1016/j.japb.2017.05.004>.
286. Marzen, M.; Iserloh, T.; de Lima, J.L.M.P.; Fister, W.; Ries, J.B. Impact of severe rain storms on soil erosion: Experimental evaluation of wind-driven rain and its implications for natural hazard management. *Sci. Total Environ.* **2017**, 590-591, 502-513. <https://doi.org/10.1016/j.scitotenv.2017.02.190>.
287. Comino, J.R.; Senciales, J.M.; Ramos, M.C.; Martínez-Casasnovas, J.A.; Lasanta, T.; Brevik, E.C.; Ries, J.B.; Sinoga, J.D.R. Understanding soil erosion processes in Mediterranean sloping vineyards (Montes de Málaga, Spain). *Geoderma* **2017**, *296*, 47-59. <https://doi.org/10.1016/j.geoderma.2017.02.021>.
288. Raju, M.V.; Asadi, S.S.; Satish Kumar, M.; Palivela, H. Estimation of runoff for agricultural utilization using geoinformatics: A model study from Telangana state. *Int. J. Civil Eng. Technol.* **2017**, *4*, 1132-1144.
289. Pagani, V.; Guarneri, T.; Fumagalli, D.; Movedi, E.; Testi, L.; Klein, T.; Calanca, P.; Villalobos, F.; Lopez-Bernal, A.; Niemeyer, S.; et al. Improving cereal yield forecasts in Europe—The impact of weather extremes. *Eur. J. Agron.* **2017**, *89*, 97-106. <https://doi.org/10.1016/j.eja.2017.06.010>.
290. Vacca, A.; Aru, F.; Ollesch, G. Short-term Impact of Coppice Management on Soil in a *Quercus ilex* l. Stand of Sardinia. *Land Degrad. Dev.* **2017**, *28*, 553-565. <https://doi.org/10.1002/ldr.2551>.
291. Caccamo, M.T.; Castorina, G.; Colombo, F.; Insinga, V.; Maiorana, E.; Magazù, S. Weather forecast performances for complex orographic areas: Impact of different grid resolutions and of geographic data on heavy rainfall event simulations in Sicily. *Atmos. Res.* **2017**, *198*, 22-33. <https://doi.org/10.1016/j.atmosres.2017.07.028>.
292. Caloiero, T.; Coscarelli, R.; Ferrari, E.; Sirangelo, B. Temporal analysis of rainfall categories in Southern Italy (Calabria Region). *Environ. Process.* **2017**, *4*, 113-124. <https://doi.org/10.1007/s40710-017-0215-1>.
293. Luque-Espinar, J.A.; Mateos, R.M.; García-Moreno, I.; Pardo-Igúzquiza, E.; Herrera, G. Spectral analysis of climate cycles to predict rainfall induced landslides in the western Mediterranean (Majorca, Spain). *Nat. Hazards* **2017**, *89*, 985-1007. <https://doi.org/10.1007/s11069-017-3003-3>.
294. Gonzalez, S.; Bech, J. Extreme point rainfall temporal scaling: a long term (1805–2014) regional and seasonal analysis in Spain. *Int. J. Climatol.* **2017**, *37*, 5068-5079. <https://doi.org/10.1002/joc.5144>.
295. García-Comendador, J.; Fortesa, J.; Calsamiglia, A.; Calvo-Cases, A.; Estrany, J. Post-fire hydrological response and suspended sediment transport of a terraced Mediterranean catchment. *Earth Surf. Proc. Land.* **2017**, *42*, 2254-2265. <https://doi.org/10.1002/esp.4181>.
296. Rajczak, J.; Schär, C. Projections of Future Precipitation Extremes Over Europe: A Multimodel Assessment of Climate Simulations. *J. Geophys. Res.-Atmos.* **2017**, *122*, 10773-10800. <https://doi.org/10.1002/2017JD027176>.
297. Rio, M.; Salles, C.; Rodier, C.; Cantet, F.; Marchand, P.; Mosser, T.; Cernesson, F.; Monfort, P.; Tournoud, M.-G. An empirical model to quantify fecal bacterial loadings to coastal areas: Application in a Mediterranean context. *C. R. Geosci.* **2017**, *349*, 299-309. <https://doi.org/10.1016/j.crte.2017.09.005>.
298. Lafore, J.-P.; Beucher, F.; Peyrillé, P.; Diongue-Niang, A.; Chapelon, N.; Bouniol, D.; Caniaux, G.; Favot, F.; Ferry, F.; Guichard, F.; et al. A multi-scale analysis of the extreme rain event of Ouagadougou in 2009. *Q. J. Roy. Meteor. Soc.* **2017**, *143*, 3094-3109. <https://doi.org/10.1002/qj.3165>.
299. López-Martínez, F.; Gil-Guirado, S.; Pérez-Morales, A. Who can you trust? Implications of institutional vulnerability in flood exposure along the Spanish Mediterranean coast. *Environ. Sci. Policy* **2017**, *76*, 29-39. <https://doi.org/10.1016/j.envsci.2017.06.004>.



300. Soares, P.M.; Cardoso, R.M.; Lima, D.C.; Miranda, P.M. Future precipitation in Portugal: high-resolution projections using WRF model and EURO-CORDEX multi-model ensembles. *Clim. Dyn.* **2017**, *49*, 2503-2530. <https://doi.org/10.1007/s00382-016-3455-2>.
301. Ciric, D.; Nieto, R.; Ramos, A.M.; Drumond, A.; Gimeno, L. Wet spells and associated moisture sources anomalies across Danube River basin. *Water* **2017**, *9*, 615. <https://doi.org/10.3390/w9080615>.
302. Stahl, N. Project reports. *Hydrol. Wasserbewirts.* **2017**, *61*, 273-279.
303. Zelenáková, M.; Alkhalaf, I.; Purcz, P.; Blišťan, P.; Pelikán, P.; Portela, M.M.; Silva, A.T. Trends of rainfall as a support for integrated water resources management in Syria. *Desalin. Water Treat.* **2017**, *86*, 285-296. <https://doi.org/10.5004/dwt.2017.20883>.
304. Zittis, G.; Bruggeman, A.; Camera, C.; Hadjinicolaou, P.; Lelieveld, J. The added value of convection permitting simulations of extreme precipitation events over the eastern Mediterranean. *Atmos. Res.* **2017**, *191*, 20-33. <https://doi.org/10.1016/j.atmosres.2017.03.002>.
305. Rodríguez-Lloveras, X.; Corella, J.P.; Benito, G. Modelling the Hydro-Sedimentary Dynamics of a Mediterranean Semiarid Ungauged Watershed Beyond the Instrumental Period. *Land Degrad. Dev.* **2017**, *28*, 1506-1518. <https://doi.org/10.1002/ldr.2678>.
306. Sachse, A.; Fischer, C.; Laronne, J.B.; Hennig, H.; Marei, A.; Kolditz, O.; Rödiger, T. Water balance estimation under the challenge of data scarcity in a hyperarid to Mediterranean region. *Hydrol. Process.* **2017**, *31*, 2395-2411. <https://doi.org/10.1002/hyp.11189>.
307. Brunet, P.; Bouvier, C. Analysis of the September 12th 2015 Lodève (France) flash flood: Influence of karsts on flood characteristics. *Houille Blanche* **2017**, *103*, 39-46. <https://doi.org/10.1051/lhb/2017020>.
308. García-Bartual, R.; Andrés-Doménech, I. A two-parameter design storm for Mediterranean convective rainfall. *Hydrol. Earth Syst. Sci.* **2017**, *21*, 2377-2387. <https://doi.org/10.5194/hess-21-2377-2017>.
309. Hernández-Ballarín, V.; Peláez-Campomanes, P. Impact of global climate in the diversity patterns of middle Miocene rodents from the Madrid Basin (Spain). *Palaeogeogr. Palaeoclimatol.* **2017**, *472*, 108-118. <https://doi.org/10.1016/j.palaeo.2017.01.029>.
310. Amengual, A.; Carrió, D.S.; Ravazzani, G.; Homar, V. A Comparison of ensemble strategies for flash flood forecasting: The 12 October 2007 case study in Valencia, Spain. *J. Hydrometeorol.* **2017**, *18*, 1143-1166. <https://doi.org/10.1175/JHM-D-16-0281.1>.
311. Mateos, R.M.; Azañón, J.M.; Roldán, F.J.; Notti, D.; Pérez-Peña, V.; Galve, J.P.; Pérez-García, J.L.; Colomo, C.M.; Gómez-López, J.M.; Montserrat, O.; et al. The combined use of PSInSAR and UAV photogrammetry techniques for the analysis of the kinematics of a coastal landslide affecting an urban area (SE Spain). *Landslides* **2017**, *14*, 743-754. <https://doi.org/10.1007/s10346-016-0723-5>.
312. Sousa, P.M.; Trigo, R.M.; Barriopedro, D.; Soares, P.M.; Ramos, A.M.; Liberato, M.L. Responses of European precipitation distributions and regimes to different blocking locations. *Clim. Dyn.* **2017**, *48*, 1141-1160. <https://doi.org/10.1007/s00382-016-3132-5>.
313. Dezfouli, A.K.; Zaitchik, B.F.; Badr, H.S.; Evans, J.; Peters-Lidard, C.D. The role of low-level, terrain-induced jets in rainfall variability in Tigris-Euphrates headwaters. *J. Hydrometeorol.* **2017**, *18*, 819-835. <https://doi.org/10.1175/JHM-D-16-0165.1>.
314. García-Aljaro, C.; Martín-Díaz, J.; Viñas-Balada, E.; Calero-Cáceres, W.; Lucena, F.; Blanch, A.R. Mobilisation of microbial indicators, microbial source tracking markers and pathogens after rainfall events. *Water Res.* **2017**, *112*, 248-253. <https://doi.org/10.1016/j.watres.2017.02.003>.
315. Drenovski, I.; Kastreva, P. The extremely rainy 2014 in Bulgaria. *Carpath. J. Earth Env.* **2017**, *12*, 171-178.
316. Taibi, S.; Meddi, M.; Mahé, G.; Assani, A. Relationships between atmospheric circulation indices and rainfall in Northern Algeria and comparison of observed and RCM-generated rainfall. *Theor. Appl. Climatol.* **2017**, *127*, 241-257. <https://doi.org/10.1007/s00704-015-1626-4>.
317. Fabbrocini, A.; Cassin, D.; Santucci, A.; Scirocco, T.; Specchiulli, A.; D'Adamo, R. Early chemical and ecotoxicological responses of the Varano lagoon (SE Italy) to a flood event. *Ecotox. Environ. Safe.* **2017**, *144*, 178-186. <https://doi.org/10.1016/j.ecoenv.2017.06.025>.
318. Gabriele, S.; Chiaravalloti, F.; Procopio, A. Radar-rain-gauge rainfall estimation for hydrological applications in small catchments. *Adv. Geosci.* **2017**, *44*, 61-66. <https://doi.org/10.5194/adgeo-44-61-2017>.
319. Lagasio, M.; Parodi, A.; Procopio, R.; Rachidi, F.; Fiori, E. Lightning Potential Index performances in multimicrophysical cloud-resolving simulations of a back-building mesoscale convective system: The Genoa 2014 event. *J. Geophys. Res.-Atmos.* **2017**, *122*, 4238-4257. <https://doi.org/10.1002/2016JD026115>.

320. Trájer, A.J. Meteorological conditions associated with West Nile fever incidences in Mediterranean and continental climates in Europe. *IDOJÁRÁS* **2017**, *121*, 303-328.
321. Ullmann, A.; Raymond, F. Atmospheric conditions of extreme precipitations in the Mediterranean basin: Present-day and future variability (1979-2100). *Méditerranée* **2017**, *128*, 9-17. <https://doi.org/10.4000/mediterranee.8521>.
322. Díaz-Barradas, M.C.; Zunzunegui, M.; Correia, O.; Ain-Lhout, F.; Esquivias, M.P.; Álvarez-Cansino, L. Gender dimorphism in *Corema album* across its biogeographical area and implications under a scenario of extreme drought events. *Environ Exp. Bot.* **2018**, *155*, 609-618. <https://doi.org/10.1016/j.envexpbot.2018.08.011>.
323. Rinat, Y.; Marra, F.; Zoccatelli, D.; Morin, E. Controls of flash flood peak discharge in Mediterranean basins and the special role of runoff-contributing areas. *J. Hydrol.* **2018**, *565*, 846-860. <https://doi.org/10.1016/j.jhydrol.2018.08.055>.
324. Ohana-Levi, N.; Givati, A.; Paz-Kagan, T.; Karnieli, A. Forest composition effect on wildfire pattern and run-off regime in a Mediterranean watershed. *Ecohydrology* **2017**, *11*, e1936. <https://doi.org/10.1002/eco.1936>.
325. Raymond, F.; Ullmann, A.; Camberlin, P. Very long winter dry spells in the Mediterranean basin: Spatio-temporal variability and impact on cereal production in Spain. *CyberGeo* **2018**. <https://doi.org/10.4000/cybergegeo.29156>.
326. Marques, I.G.; Campelo, F.; Rivaes, R.; Albuquerque, A.; Ferreira, M.T.; Rodríguez-González, P.M. Tree rings reveal long-term changes in growth resilience in Southern European riparian forests. *Dendrochronologia* **2018**, *52*, 167-176. <https://doi.org/10.1016/j.dendro.2018.10.009>.
327. Pereira, S.; Ramos, A.M.; Rebelo, L.; Trigo, R.M.; Zêzere, J.L. A centennial catalogue of hydrogeomorphological events and their atmospheric forcing. *Adv. Water Resour.* **2018**, *122*, 98-112. <https://doi.org/10.1016/j.advwatres.2018.10.001>.
328. Abbasnia, M.; Toros, H. Analysis of long-term changes in extreme climatic indices: a case study of the Mediterranean climate, Marmara Region, Turkey. *Pure Appl. Geophys.* **2018**, *175*, 3861-3873. <https://doi.org/10.1007/s00024-018-1888-8>.
329. Mathbout, S.; Lopez-Bustins, J.A.; Royé, D.; Martin-Vide, J.; Bech, J.; Rodrigo, F.S. Observed changes in daily precipitation extremes at annual timescale over the eastern Mediterranean during 1961-2012. *Pure Appl. Geophys.* **2018**, *175*, 3875-3890. <https://doi.org/10.1007/s00024-017-1695-7>.
330. Tramblay, Y.; Somot, S. Future evolution of extreme precipitation in the Mediterranean. *Climatic Change* **2018**, *151*, 289-302. <https://doi.org/10.1007/s10584-018-2300-5>.
331. Zittis, G. Observed rainfall trends and precipitation uncertainty in the vicinity of the Mediterranean, Middle East and North Africa. *Theor. Appl. Climatol.* **2018**, *134*, 1207-1230. <https://doi.org/10.1007/s00704-017-2333-0>.
332. Amponsah, W.; Ayral, P.-A.; Boudevillain, B.; Bouvier, C.; Braud, I.; Brunet, P.; Delrieu, G.; Didon-Lescot, J.-F.; Gaume, E.; Lebouc, L.; et al. Integrated high-resolution dataset of high-intensity European and Mediterranean flash floods. *Earth Syst. Sci. Data* **2018**, *10*, 1783-1794. <https://doi.org/10.5194/essd-10-1783-2018>.
333. Maheras, P.; Tolika, K.; Anagnostopoulou, C.; Makra, L.; Szpirosz, K.; Károssy, C. Relationship between mean and extreme precipitation and circulation types over Hungary. *Int. J. Climatol.* **2018**, *38*, 4518-4532. <https://doi.org/10.1002/joc.5684>.
334. Wibig, J.; Piotrowski, P. Impact of the air temperature and atmospheric circulation on extreme precipitation in Poland. *Int. J. Climatol.* **2018**, *38*, 4533-4549. <https://doi.org/10.1002/joc.5685>.
335. El-Samra, R.; Bou-Zeid, E.; El-Fadel, M. To what extent does high-resolution dynamical downscaling improve the representation of climatic extremes over an orographically complex terrain?. *Theor. Appl. Climatol.* **2018**, *134*, 265-282. <https://doi.org/10.1007/s00704-017-2273-8>.
336. Ciric, D.; Nieto, R.; Ramos, A.M.; Drumond, A.; Gimeno, L. Contribution of moisture from Mediterranean Sea to extreme precipitation events over Danube River Basin. *Water* **2018**, *10*, 1182. <https://doi.org/10.3390/w10091182>.
337. Nastos, P.T.; Papadimou, K.K.; Matsangouras, I.T. Mediterranean tropical-like cyclones: Impacts and composite daily means and anomalies of synoptic patterns. *Atmos. Res.* **2018**, *208*, 156-166. <https://doi.org/10.1016/j.atmosres.2017.10.023>.
338. Payab, A.H.; Türker, U. Analyzing temporal-spatial characteristics of drought events in the northern part of Cyprus. *Environ. Dev. Sustain.* **2018**, *20*, 1553-1574. <https://doi.org/10.1007/s10668-017-9953-5>.

339. Blanchet, J.; Molinié, G.; Touati, J. Spatial analysis of trend in extreme daily rainfall in southern France. *Clim. Dyn.* **2018**, *51*, 799-812. <https://doi.org/10.1007/s00382-016-3122-7>.
340. De Paola, F.; Giugni, M.; Pugliese, F.; Annis, A.; Nardi, F. GEV parameter estimation and stationary vs. non-stationary analysis of extreme rainfall in African test cities. *Hydrology* **2018**, *5*, 28. <https://doi.org/10.3390/hydrology5020028>.
341. Armon, M.; Dente, E.; Smith, J.A.; Enzel, Y.; Morin, E. Synoptic-scale control over modern rainfall and flood patterns in the Levant drylands with implications for past climates. *J. Hydrometeorol.* **2018**, *19*, 1077-1096. <https://doi.org/10.1175/JHM-D-18-0013.1>.
342. Fisher, R.N.; Brehme, C.S.; Hathaway, S.A.; Hovey, T.E.; Warburton, M.L.; Stokes, D.C. Longevity and population age structure of the arroyo southwestern toad (*Anaxyrus californicus*) with drought implications. *Ecol. Evol.* **2018**, *8*, 6124-6132. <https://doi.org/10.1002/ece3.4158>.
343. Pérez-Zanón, N.; Casas-Castillo, M.C.; Peña, J.C.; Aran, M.; Rodríguez-Solà, R.; Redaño, A.; Solé, G. Analysis of synoptic patterns in relationship with severe rainfall events in the Ebre Observatory (Catalonia). *Acta Geophys.* **2018**, *66*, 405-414. <https://doi.org/10.1007/s11600-018-0126-1>.
344. Morianou, G.G.; Kourgialas, N.N.; Karatzas, G.P.; Nikolaidis, N.P. Assessing hydro-morphological changes in Mediterranean stream using curvilinear grid modeling approach-climate change impacts. *Earth Sci. Inform.* **2018**, *11*, 205-216. <https://doi.org/10.1007/s12145-017-0326-2>.
345. Saber, M.; Yilmaz, K.K. Evaluation and bias correction of satellite-based rainfall estimates for modelling flash floods over the Mediterranean region: application to Karpuz River Basin, Turkey. *Water* **2018**, *10*, 657. <https://doi.org/10.3390/w10050657>.
346. Tolika, K.; Maheras, P.; Anagnostopoulou, C. The exceptionally wet year of 2014 over Greece: A statistical and synoptical-atmospheric analysis over the region of Thessaloniki. *Theor. Appl. Climatol.* **2018**, *132*, 809-821. <https://doi.org/10.1007/s00704-017-2131-8>.
347. Peleg, N.; Marra, F.; Fatichi, S.; Molnar, P.; Morin, E.; Sharma, A.; Burlando, P. Intensification of convective rain cells at warmer temperatures observed from high-resolution weather radar data. *J. Hydrometeorol.* **2018**, *19*, 715-726. <https://doi.org/10.1175/JHM-D-17-0158.1>.
348. Spinoni, J.; Vogt, J.V.; Naumann, G.; Barbosa, P.; Dosio, A. Will drought events become more frequent and severe in Europe?. *Int. J. Climatol.* **2018**, *38*, 1718-1736. <https://doi.org/10.1002/joc.5291>.
349. Barcikowska, M.J.; Kapnick, S.B.; Feser, F. Impact of large-scale circulation changes in the North Atlantic sector on the current and future Mediterranean winter hydroclimate. *Clim. Dyn.* **2018**, *50*, 2039-2059. <https://doi.org/10.1007/s00382-017-3735-5>.
350. Cardoso, P.G.; Dolbeth, M.; Sousa, R.; Relvas, P.; Santos, R.; Silva, A.; Quintino, V. The Portuguese Coast. In *World Seas: An Environmental Evaluation*, 2nd ed.; Sheppard, C., Ed.; Academic Press, 2019. Volume 1, pp. 189-208. <https://doi.org/10.1016/B978-0-12-805068-2.00009-7>.
351. Szpakowski, W.; Szydlowski, M. Evaluating the Catastrophic Rainfall of 14 July 2016 in the Catchment Basin of the Urbanized Strzyza Stream in Gdańsk, Poland. *Pol. J. Environ. Stud.* **2018**, *27*, 861-869. <https://doi.org/10.15244/pjoes/75962>.
352. Peleg, N.; Marra, F.; Fatichi, S.; Paschalis, A.; Molnar, P.; Burlando, P. Spatial variability of extreme rainfall at radar subpixel scale. *J. Hydrol.* **2018**, *556*, 922-933. <https://doi.org/10.1016/j.jhydrol.2016.05.033>.
353. Diodato, N.; Bellocchi, G. Using historical precipitation patterns to forecast daily extremes of rainfall for the coming decades in Naples (Italy). *Geosciences* **2018**, *8*, 293. <https://doi.org/10.3390/geosciences8080293>.
354. Gallus, W.A., Jr.; Parodi, A.; Maugeri, M. Possible impacts of a changing climate on intense Ligurian Sea rainfall events. *Int. J. Climatol.* **2018**, *38*, e323-e329. <https://doi.org/10.1002/joc.5372>.
355. Libertino, A.; Ganora, D.; Claps, P. Space-time analysis of rainfall extremes in Italy: clues from a reconciled dataset. *Hydrol. Earth Syst. Sci.* **2018**, *22*, 2705-2715. <https://doi.org/10.5194/hess-22-2705-2018>.
356. Pensieri, S.; Schiano, M.E.; Picco, P.; Tizzi, M.; Bozzano, R. Analysis of the precipitation regime over the Ligurian Sea. *Water* **2018**, *10*, 566. <https://doi.org/10.3390/w10050566>.
357. Cardil, A.; Vega-García, C.; Ascoli, D.; Molina-Terrén, D.M.; Silva, C.A.; Rodrigues, M. How does drought impact burned area in Mediterranean vegetation communities?. *Sci. Total Environ.* **2019**, *693*, 133603. <https://doi.org/10.1016/j.scitotenv.2019.133603>.

358. Alon, M.; Sternberg, M. Effects of extreme drought on primary production, species composition and species diversity of a Mediterranean annual plant community. *J. Veg. Sci.* **2019**, *30*, 1045-1061. <https://doi.org/10.1111/jvs.12807>.
359. Godfree, R.C.; Knerr, N.; Godfree, D.; Busby, J.; Robertson, B.; Encinas-Viso, F. Historical reconstruction unveils the risk of mass mortality and ecosystem collapse during pancontinental megadrought. *Proc. Natl. Acad. Sci.* **2019**, *116*, 15580-15589. <https://doi.org/10.1073/pnas.1902046116>.
360. Uzun, A.; Ustaoglu, B. Impacts of El Nino Southern Oscillation (ENSO) and North Atlantic Oscillation (NAO) on the olive yield in the mediterranean region, Turkey. In Proceedings of the 8th International Conference on Agro-Geoinformatics (Agro-Geoinformatics), Istanbul, Turkey, 16-19 July 2019; pp. 1-6. <https://doi.org/10.1109/Agro-Geoinformatics.2019.8820566>.
361. Castro, S.P.; Cleland, E.E.; Wagner, R.; Al Sawad, R.; Lipson, D.A. Soil microbial responses to drought and exotic plants shift carbon metabolism. *ISME J.* **2019**, *13*, 1776-1787. <https://doi.org/10.1038/s41396-019-0389-9>.
362. García-Llamas, P.; Suárez-Seoane, S.; Taboada, A.; Fernández-Manso, A.; Quintano, C.; Fernández-García, V.; Fernández-Guisuraga, J.M.; Marcos, E.; Calvo, L. Environmental drivers of fire severity in extreme fire events that affect Mediterranean pine forest ecosystems. *Forest Ecol. Manag.* **2019**, *433*, 24-32. <https://doi.org/10.1016/j.foreco.2018.10.051>.
363. Castro, H.; Castro, P. Mediterranean Marginal Lands in Face of Climate Change: Biodiversity and Ecosystem Services. In *Climate Change-Resilient Agriculture and Agroforestry. Climate Change Management*, 1st ed.; Castro, P., Azul, A.M., Leal Filho, W., Azeiteiro, U.M., Eds.; Springer, Cham, Switzerland, 2019; pp 175-187. [https://doi.org/10.1007/978-3-319-75004-0\\_10](https://doi.org/10.1007/978-3-319-75004-0_10).
364. Rodríguez, A.; Durán, J.; Rey, A.; Boudouris, I.; Valladares, F.; Gallardo, A.; Yuste, J.C. Interactive effects of forest die-off and drying-rewetting cycles on C and N mineralization. *Geoderma* **2019**, *333*, 81-89. <https://doi.org/10.1016/j.geoderma.2018.07.003>.
365. Flores, M.J.; Ropero, R.F.; Rumí, R. Assessment of flood risk in Mediterranean catchments: an approach based on Bayesian networks. *Stoch. Env. Res. Risk A.* **2019**, *33*, 1991-2005. <https://doi.org/10.1007/s00477-019-01746-3>.
366. Myers, M.R.; Barnard, P.L.; Beighley, E.; Cayan, D.R.; Dugan, J.E.; Feng, D.; Hubbard, D.M.; Iacobellis, S.F.; Melack, J.M.; Page, H.M. A multidisciplinary coastal vulnerability assessment for local government focused on ecosystems, Santa Barbara area, California. *Ocean Coast. Manage.* **2019**, *182*, 104921. <https://doi.org/10.1016/j.ocecoaman.2019.104921>.
367. Lorenzo-Lacruz, J.; Amengual, A.; Garcia, C.; Morán-Tejeda, E.; Homar, V.; Maimó-Far, A.; Hermoso, A.; Ramis, C.; Romero, R. Hydro-meteorological reconstruction and geomorphological impact assessment of the October 2018 catastrophic flash flood at Sant Llorenç, Mallorca (Spain). *Nat. Hazards Earth Syst. Sci.* **2019**, *19*, 2597-2617. <https://doi.org/10.5194/nhess-19-2597-2019>.
368. Caloiero, T.; Coscarelli, R.; Gaudio, R. Spatial and temporal variability of daily precipitation concentration in the Sardinia region (Italy). *Int. J. Climatol.* **2019**, *39*, 5006-5021. <https://doi.org/10.1002/joc.6123>.
369. Shaffie, S.; Mozaffari, G.; Khosravi, Y. Determination of extreme precipitation threshold and analysis of its effective patterns (case study: west of Iran). *Nat. Hazards* **2019**, *99*, 857-878. <https://doi.org/10.1007/s11069-019-03779-x>.
370. Anker, Y.; Mirlas, V.; Gimburg, A.; Zilberbrand, M.; Nakonechny, F.; Meir, I.; Inbar, M. Effect of rapid urbanization on Mediterranean karstic mountainous drainage basins. *Sustain. Cities Soc.* **2019**, *51*, 101704. <https://doi.org/10.1016/j.scs.2019.101704>.
371. Insua-Costa, D.; Miguez-Macho, G.; Llasat, M.C. Local and remote moisture sources for extreme precipitation: a study of the two catastrophic 1982 western Mediterranean episodes. *Hydrol. Earth Syst. Sci.* **2019**, *23*, 3885-3900. <https://doi.org/10.5194/hess-23-3885-2019>.
372. Sahar, T.; Abbas, E.-Z.; Tarek, R.; Noha, A.A. Increasing vulnerability to hydro-climatic threats by coastline modifications in Alexandria, Egypt. *Disaster Adv.* **2019**, *12*, 21-30.
373. Bednorz, E.; Wrzesiński, D.; Tomczyk, A.M.; Jasik, D. Classification of synoptic conditions of summer floods in polish Sudeten Mountains. *Water* **2019**, *11*, 1450. <https://doi.org/10.3390/w11071450>.
374. Pujalte, V.; Monechi, S.; Ortíz, S.; Orue-Etxebarria, X.; Rodríguez-Tovar, F.; Schmitz, B. Microcodium-rich turbidites in hemipelagic sediments during the Paleocene-Eocene Thermal Maximum: Evidence for extreme precipitation events in a Mediterranean climate (Río Gor section, southern Spain). *Global Planet. Change* **2019**, *178*, 153-167. <https://doi.org/10.1016/j.gloplacha.2019.04.018>.

375. Gaspar, L.; Lizaga, I.; Blake, W.H.; Latorre, B.; Quijano, L.; Navas, A. Fingerprinting changes in source contribution for evaluating soil response during an exceptional rainfall in Spanish pre-pyrenees. *J. Environ. Manage.* **2019**, *240*, 136-148. <https://doi.org/10.1016/j.jenvman.2019.03.109>.
376. Zhang, R.; Corte-Real, J.; Moreira, M.; Kilsby, C.; Birkinshaw, S.; Burton, A.; Fowler, H.J.; Forsythe, N.; Nunes, J.P.; Sampaio, E.; et al. Downscaling climate change of water availability, sediment yield and extreme events: Application to a Mediterranean climate basin. *Int. J. Climatol.* **2019**, *39*, 2947-2963. <https://doi.org/10.1002/joc.5994>.
377. Van Der Horst, S.V.J.; Pitman, A.J.; De Kauwe, M.G.; Ukkola, A.; Abramowitz, G.; Isaac, P. How representative are FLUXNET measurements of surface fluxes during temperature extremes?. *Biogeosciences* **2019**, *16*, 1829-1844. <https://doi.org/10.5194/bg-16-1829-2019>.
378. Diakhate, M.; Rodriguez-Fonseca, B.; Gómara, I.; Mohino, E.; Dieng, A.L.; Gaye, A.T. Oceanic forcing on interannual variability of Sahel heavy and moderate daily rainfall. *J. Hydrometeorol.* **2019**, *20*, 397-410. <https://doi.org/10.1175/JHM-D-18-0035.1>.
379. Ribes, A.; Thao, S.; Vautard, R.; Dubuisson, B.; Somot, S.; Colin, J.; Planton, S.; Soubeyroux, J.-M. Observed increase in extreme daily rainfall in the French Mediterranean. *Clim. Dyn.* **2019**, *52*, 1095-1114. <https://doi.org/10.1007/s00382-018-4179-2>.
380. Kushnir, Y.; Stein, M. Medieval climate in the Eastern Mediterranean: Instability and evidence of solar forcing. *Atmosphere* **2019**, *10*, 29. <https://doi.org/10.3390/atmos10010029>.
381. Mori, C.; Orsini, A.; Colonna, F.; Orsini, S.; Souleiman, I. Consequences of climate change for freshwaters of Corsica. In Proceedings of the 14th MEDCOAST Congress on Coastal and Marine Sciences, Engineering, Management and Conservation, MEDCOAST 2019, Marmaris, Turkey, 22-26 October 2019.
382. Mohammed, S.A.; Fallah, R.Q. Climate change indicators in Alsheikh-Badr Basin (Syria). *Geogr. Environ. Sustain.* **2019**, *12*, 87-96. <https://doi.org/10.24057/2071-9388-2018-63>.
383. Frumkin, A.; Comay, O. The last glacial cycle of the southern Levant: Paleoenvironment and chronology of modern humans. *J. Hum. Evol.* **2021**, *160*, 102609. <https://doi.org/10.1016/j.jhevol.2019.04.007>.
384. Balasch, J.C.; Pino, D.; Ruiz-Bellet, J.L.; Tuset, J.; Barriendos, M.; Castelltort, X.; Peña, J.C. The extreme floods in the Ebro River basin since 1600 CE. *Sci. Total Environ.* **2019**, *646*, 645-660. <https://doi.org/10.1016/j.scitotenv.2018.07.325>.
385. Paliaga, G.; Faccini, F.; Luino, F.; Turconi, L. A spatial multicriteria prioritizing approach for geo-hydrological risk mitigation planning in small and densely urbanized Mediterranean basins. *Nat. Hazards Earth Syst. Sci.* **2019**, *19*, 53-69. <https://doi.org/10.5194/nhess-19-53-2019>.
386. Pumo, D.; Carlino, G.; Blenkinsop, S.; Arnone, E.; Fowler, H.; Noto, L.V. Sensitivity of extreme rainfall to temperature in semi-arid Mediterranean regions. *Atmos. Res.* **2019**, *225*, 30-44. <https://doi.org/10.1016/j.atmosres.2019.03.036>.
387. Sappa, G.; Ferranti, F.; De Filippi, F.M.; Iacurto, S. Recent drought effects on bracciano lake water availability. In Proceedings of the 19th International Multidisciplinary Scientific GeoConference SGEM 2019, Albena, Bulgaria, 30 June 2019 - 6 July 2019; pp. 457-464. <https://doi.org/10.5593/sgem2019/3.1/S12.059>.
388. Ballesteros-Canovas, J.A.; Bombino, G.; D'Agostino, D.; Denisi, P.; Labate, A.; Stoffel, M.; Zema, D.A.; Zimbone, S.M. Tree-ring based, regional-scale reconstruction of flash floods in Mediterranean mountain torrents. *Catena* **2020**, *189*, 104481. <https://doi.org/10.1016/j.catena.2020.104481>.
389. Mohammed, S.; Alsafadi, K.; Al-Awadhi, T.; Sherief, Y.; Harsanyie, E.; El Kenawy, A.M. Space and time variability of meteorological drought in Syria. *Acta Geophys.* **2020**, *68*, 1877-1898. <https://doi.org/10.1007/s11600-020-00501-5>.
390. Morán-Ordóñez, A.; Duane, A.; Gil-Tena, A.; De Cáceres, M.; Aquilué, N.; Guerra, C.A.; Geijzendorffer, I.R.; Fortin, M.-J.; Brotons, L. Future impact of climate extremes in the Mediterranean: Soil erosion projections when fire and extreme rainfall meet. *Land Degrad. Dev.* **2020**, *31*, 3040-3054. <https://doi.org/10.1002/ldr.3694>.
391. Gavinet, J.; Ourcival, J.-M.; Gauzere, J.; de Jalón, L.G.; Limousin, J.M. Drought mitigation by thinning: Benefits from the stem to the stand along 15 years of experimental rainfall exclusion in a holm oak coppice. *Forest Ecol. Manag.* **2020**, *473*, 118266. <https://doi.org/10.1016/j.foreco.2020.118266>.

392. Liu, D.; Zhang, C.; Ogaya, R.; Estiarte, M.; Peñuelas, J. Effects of decadal experimental drought and climate extremes on vegetation growth in Mediterranean forests and shrublands. *J. Veg. Sci.* **2020**, *31*, 768-779. <https://doi.org/10.1111/jvs.12902>.
393. Delač, D.; Pereira, P.; Bogunovic, I.; Kisić, I. Short-Term Effects of Pile Burn on N Dynamic and N Loss in Mediterranean Croatia. *Agronomy* **2020**, *10*, 1340. <https://doi.org/10.3390/agronomy10091340>.
394. Kiro, Y.; Goldstein, S.L.; Kushnir, Y.; Olson, J.M.; Bolge, L.; Lazar, B.; Stein, M. Droughts, flooding events, and shifts in water sources and seasonality characterize last interglacial Levant climate. *Quaternary Sci. Rev.* **2020**, *248*, 106546. <https://doi.org/10.1016/j.quascirev.2020.106546>.
395. Lagasio, M.; Meroni, A.N.; Boni, G.; Pulvirenti, L.; Monti-Guarnieri, A.; Haagmans, R.; Hobbs, S.; Parodi, A. Meteorological OSSEs for New Zenith Total Delay Observations: Impact Assessment for the Hydroterra Geosynchronous Satellite on the October 2019 Genoa Event. *Remote Sens.* **2020**, *12*, 3787. <https://doi.org/10.3390/rs12223787>.
396. Papatheodorou, E.M.; Papapostolou, A.; Monokrousos, N.; Jones, D.-W.; Scullion, J.; Stamou, G.P. Crust cover and prior soil moisture status affect the response of soil microbial community and function to extreme rain events in an arid area. *Eur. J. Soil Biol.* **2020**, *101*, 103243. <https://doi.org/10.1016/j.ejsobi.2020.103243>.
397. Moral-Erencia, J.D.; Bohorquez, P.; Jimenez-Ruiz, P.J.; Pérez-Latorre, F.J. Slackwater Sediments Record the Increase in Sub-daily Rain Flood due to Climate Change in a European Mediterranean Catchment. *Water Resour. Manag.* **2020**, *34*, 4431-4447. <https://doi.org/10.1007/s11269-020-02563-y>.
398. Camera, C.; Bruggeman, A.; Zittis, G.; Sofokleous, I.; Arnault, J. Simulation of extreme rainfall and streamflow events in small Mediterranean watersheds with a one-way-coupled atmospheric-hydrologic modelling system. *Nat. Hazards Earth Syst. Sci.* **2020**, *20*, 2791-2810. <https://doi.org/10.5194/nhess-20-2791-2020>.
399. Lynch, S.A.; Coghlan, A.; Leary, B.O.; Morgan, E.; Culloty, S.C. Northward establishment of the mediterranean mussel *Mytilus galloprovincialis* limited by changing climate. *Biol. Invasions* **2020**, *22*, 2725-2736. <https://doi.org/10.1007/s10530-020-02294-6>.
400. Noyer, M.; Reoyo-Prats, B.; Aubert, D.; Bernard, M.; Verneau, O.; Palacios, C. Particle-attached riverine bacteriome shifts in a pollutant-resistant and pathogenic community during a Mediterranean extreme storm event. *Sci. Total Environ.* **2020**, *732*, 139047. <https://doi.org/10.1016/j.scitotenv.2020.139047>.
401. Baldi, M.; Amin, D.; Al Zayed, I.S.; Dalu, G. Climatology and Dynamical Evolution of Extreme Rainfall Events in the Sinai Peninsula-Egypt. *Sustainability* **2020**, *12*, 6186. <https://doi.org/10.3390/su12156186>.
402. Andrews, J.E.; Carolin, S.A.; Peckover, E.N.; Marca, A.; Al-Omari, S.; Rowe, P.J. Holocene stable isotope record of insolation and rapid climate change in a stalagmite from the Zagros of Iran. *Quaternary Sci. Rev.* **2020**, *241*, 106433. <https://doi.org/10.1016/j.quascirev.2020.106433>.
403. Benabdelouahab, T.; Gadouali, F.; Boudhar, A.; Lebrini, Y.; Hadria, R.; Salhi, A. Analysis and trends of rainfall amounts and extreme events in the Western Mediterranean region. *Theor. Appl. Climatol.* **2020**, *141*, 309-320. <https://doi.org/10.1007/s00704-020-03205-4>.
404. Baltacı, H. The role of atmospheric processes associated with a flash-flood event over Northwestern Turkey. *Pure Appl. Geophys.* **2020**, *177*, 3513-3526. <https://doi.org/10.1007/s00024-019-02413-y>.
405. Fumière, Q.; Déqué, M.; Nuissier, O.; Somot, S.; Alias, A.; Caillaud, C.; Laurantin, O.; Seity, Y. Extreme rainfall in Mediterranean France during the fall: added value of the CNRM-AROME Convection-Permitting Regional Climate Model. *Clim. Dyn.* **2020**, *55*, 77-91. <https://doi.org/10.1007/s00382-019-04898-8>.
406. Herrera, S.; Soares, P.M.M.; Cardoso, R.M.; Gutiérrez, J.M. Evaluation of the EURO-CORDEX Regional Climate Models Over the Iberian Peninsula: Observational Uncertainty Analysis. *J. Geophys. Res.-Atmos.* **2020**, *125*, e2020JD032880. <https://doi.org/10.1029/2020JD032880>.
407. Gader, K.; Gara, A.; Vanclooster, M.; Khlifi, S.; Slimani, M. Drought assessment in a south Mediterranean transboundary catchment. *Hydrolog. Sci. J.* **2020**, *65*, 1300-1315. <https://doi.org/10.1080/02626667.2020.1747621>.
408. Tzouvaras, M.; Danezis, C.; Hadjimitsis, D.G. Differential SAR Interferometry Using Sentinel-1 Imagery-Limitations in Monitoring Fast Moving Landslides: The Case Study of Cyprus. *Geosciences* **2020**, *10*, 236. <https://doi.org/10.3390/geosciences10060236>.

409. Diakhaté, M.; Suárez-Moreno, R.; Gómara, I.; Mohino, E. Statistical-observational analysis of skillful oceanic predictors of heavy daily precipitation events in the Sahel. *Atmosphere* **2020**, *11*, 584. <https://doi.org/10.3390/atmos11060584>.
410. Boccia, L.; Capolupo, A.; Rigillo, M.; Russo, V. Terrace Abandonment Hazards in a Mediterranean Cultural Landscape. *J. Hazard. Toxic Radioact. Waste* **2020**, *24*. [https://doi.org/10.1061/\(ASCE\)HZ.2153-5515.0000473](https://doi.org/10.1061/(ASCE)HZ.2153-5515.0000473).
411. Benkirane, M.; Laftouhi, N.-E.; El Mansouri, B.; Salik, I.; Snineh, M.; El Ghazali, F.E.; Kamal, S.; Zamrane, Z. An approach for flood assessment by numerical modeling of extreme hydrological events in the Zat watershed (High Atlas, Morocco). *Urban Water J.* **2020**, *17*, 381-389. <https://doi.org/10.1080/1573062X.2020.1734946>.
412. Ponzano, M.; Joly, B.; Descamps, L.; Arbogast, P. Systematic error analysis of heavy-precipitation-event prediction using a 30-year hindcast dataset. *Nat. Hazards Earth Syst. Sci.* **2020**, *20*, 1369-1389. <https://doi.org/10.5194/nhess-20-1369-2020>.
413. Zittis, G.; Bruggeman, A.; Camera, C. 21st Century Projections of Extreme Precipitation Indicators for Cyprus. *Atmosphere* **2020**, *11*, 343. <https://doi.org/10.3390/atmos11040343>.
414. Benito, G.; Sanchez-Moya, Y.; Medialdea, A.; Barriendos, M.; Calle, M.; Rico, M.; Sopena, A.; Machado, M.J. Extreme floods in small mediterranean catchments: Long-term response to climate variability and change. *Water* **2020**, *12*, 1008. <https://doi.org/10.3390/w12041008>.
415. Morsy, M.; Sayad, T.; Khamees, A.S. Towards instability index development for heavy rainfall events over Egypt and the Eastern Mediterranean. *Meteorol. Atmos. Phys.* **2020**, *132*, 255-272. <https://doi.org/10.1007/s00703-019-00686-5>.
416. Linares, C.; Díaz, J.; Negev, M.; Martínez, G.S.; Debono, R.; Paz, S. Impacts of climate change on the public health of the Mediterranean Basin population-current situation, projections, preparedness and adaptation. *Environ. Res.* **2020**, *182*, 109107. <https://doi.org/10.1016/j.envres.2019.109107>.
417. Caloiero, T.; Coscarelli, R. Analysis of the Characteristics of Dry and Wet Spells in a Mediterranean Region. *Environ. Process.* **2020**, *7*, 691-701. <https://doi.org/10.1007/s40710-020-00454-3>.
418. Sauvage, C.; Lebeaupin Brossier, C.; Bouin, M.-N.; Ducrocq, V. Characterization of the air-sea exchange mechanisms during a Mediterranean heavy precipitation event using realistic sea state modelling. *Atmos. Chem. Phys.* **2020**, *20*, 1675-1699. <https://doi.org/10.5194/acp-20-1675-2020>.
419. Lorente-Plazas, R.; Montavez, J.P.; Ramos, A.M.; Jerez, S.; Trigo, R.M.; Jimenez-Guerrero, P. Unusual atmospheric-river-like structures coming from Africa induce extreme precipitation over the western Mediterranean Sea. *J. Geophys. Res-Atmos.* **2020**, *125*, e2019JD031280. <https://doi.org/10.1029/2019JD031280>.
420. Galarza, A. Breeding biology of the Little Egret *Egretta garzetta* on the southern coast of the Bay of Biscay. *Bird Study* **2020**, *67*, 85-92. <https://doi.org/10.1080/00063657.2020.1779653>.
421. Rivas, V.; Remondo, J.; Bonachea, J.; Sánchez-Espeso, J. Rainfall and weather conditions inducing intense landslide activity in northern Spain (Deba, Guipúzcoa). *Phys. Geogr.* **2020**. <https://doi.org/10.1080/02723646.2020.1866790>.
422. Lagouvardos, K.; Dafis, S.; Giannaros, C.; Karagiannidis, A.; Kotroni, V. Investigating the role of extreme synoptic patterns and complex topography during two heavy rainfall events in Crete in February 2019. *Climate* **2020**, *8*, 87. <https://doi.org/10.3390/cli8070087>.
423. Hayek, A.; Khraibani, Z.; Radwan, D.; Tabaja, N.; Andaloussi, S.A.; Toufaily, J.; Garnier-Zarli, E.; Hamieh, T. Analysis of the extreme and records values for temperature and precipitation in Lebanon. *Commun. Stat.* **2020**, *6*, 411-428. <https://doi.org/10.1080/23737484.2020.1765899>.
424. Cipolla, G.; Francipane, A.; Noto, L.V. Classification of extreme rainfall for a Mediterranean region by means of atmospheric circulation patterns and reanalysis data. *Water Resour. Manage.* **2020**, *34*, 3219-3235. <https://doi.org/10.1007/s11269-020-02609-1>.
425. Cuccoli, F.; Facheris, L.; Antonini, A.; Melani, S.; Baldini, L. Weather radar and rain-gauge data fusion for quantitative precipitation estimation: Two case studies. *IEEE Trans. Geosci. Remote Sens.* **2020**, *58*, 6639-6649. <https://doi.org/10.1109/TGRS.2020.2978439>.
426. Gangoiti, G.; de Cámara, E.S.; Alonso, L.; Iza, J.; García, J.A.; Valdenebro, V.; Gómez, M.C.; Navazo, M.; García, E. Simultaneous episodes of heavy rainfall in Morocco and Southern Alps: 2. Time scales and mapping of remote and local evaporative sources. *J. Geophys. Res-Atmos.* **2020**, *125*, e2019JD030437. <https://doi.org/10.1029/2019JD030437>.

427. Gangoiti, G.; de Cámara, E.S.; Alonso, L.; Iza, J.; García, J.A.; Valdenebro, V.; Gómez, M.C.; Navazo, M.; García, E. Simultaneous episodes of heavy rainfall in Morocco and Southern Alps: 1. Mesoscale simulations and episode climatology (1979–2016). *J. Geophys. Res-Atmos.* **2020**, *125*, e2019JD030432. <https://doi.org/10.1029/2019JD030432>.
428. Greco, A.; De Luca, D.L.; Avolio, E. Heavy precipitation systems in Calabria Region (Southern Italy): High-resolution observed rainfall and large-scale atmospheric pattern analysis. *Water* **2020**, *12*, 1468. <https://doi.org/10.3390/w12051468>.
429. Pelosi, A.; Furcolo, P.; Rossi, F.; Villani, P. The characterization of extraordinary extreme events (EEEs) for the assessment of design rainfall depths with high return periods. *Hydrol. Process.* **2020**, *34*, 2543–2559. <https://doi.org/10.1002/hyp.13747>.
430. Roccati, A.; Paliaga, G.; Luino, F.; Faccini, F.; Turconi, L. Rainfall threshold for shallow landslides initiation and analysis of long-term rainfall trends in a Mediterranean area. *Atmosphere* **2020**, *11*, 1367. <https://doi.org/10.3390/atmos11121367>.
431. Rodríguez, B.C.; Zuazo, V.H.D.; Rodríguez, M.S.; Ruiz, B.G.; García-Tejero, I.F. Soil Erosion and the Efficiency of the Conservation Measures in Mediterranean Hillslope Farming (SE Spain). *Eurasian Soil Sci.* **2021**, *54*, 792–806. <https://doi.org/10.1134/S1064229321050069>.
432. Fong, C.R.; Kennison, R.L.; Fong, P. Nutrient Subsidies to Southern California Estuaries Can Be Characterized as Pulse-Interpulse Regimes that May Be Dampened with Extreme Eutrophy. *Estuaries Coasts* **2021**, *44*, 867–874. <https://doi.org/10.1007/s12237-020-00810-4>.
433. Connell, J.; Hall, M.A.; Nimmo, D.G.; Watson, S.J.; Clarke, M.F. Fire, drought and flooding rains: The effect of climatic extremes on bird species' responses to time since fire. *Divers. Distrib.* **2021**. <https://doi.org/10.1111/ddi.13287>.
434. Mohammed, S.; Hassan, E.; Abdo, H.G.; Szabo, S.; Mokhtar, A.; Alsafadi, K.; Al-Khour, I.; Comino, J.R. Impacts of rainstorms on soil erosion and organic matter for different cover crop systems in the western coast agricultural region of Syria. *Soil Use Manage.* **2021**, *37*, 196–213. <https://doi.org/10.1111/sum.12683>.
435. Zittis, G.; Bruggeman, A.; Lelieveld, J. Revisiting future extreme precipitation trends in the Mediterranean. *Weather Clim. Extrem.* **2021**, *34*, 100380. <https://doi.org/10.1016/j.wace.2021.100380>.
436. Gómez-Martínez, G.; Galiano, L.; Rubio, T.; Prado-López, C.; Redolat, D.; Paradinas Blázquez, C.; Gaitán, E.; Pedro-Monzónis, M.; Ferriz-Sánchez, S.; Añó Soto, M.; et al. Effects of Climate Change on Water Quality in the Júcar River Basin (Spain). *Water* **2021**, *13*, 2424. <https://doi.org/10.3390/w13172424>.
437. Llasat, M.C.; del Moral, A.; Cortès, M.; Rigo, T. Convective precipitation trends in the Spanish Mediterranean region. *Atmos. Res.* **2021**, *257*, 105581. <https://doi.org/10.1016/j.atmosres.2021.105581>.
438. Zerouali, B.; Chettih, M.; Abda, Z.; Mesbah, M.; Santos, C.A.G.; Brasil Neto, R.M.; da Silva, R.M. Spatiotemporal meteorological drought assessment in a humid Mediterranean region: case study of the Oued Sebaou basin (northern central Algeria). *Nat. Hazards* **2021**, *108*, 689–709. <https://doi.org/10.1007/s11069-021-04701-0>.
439. Pérez, R.E.; Cortés-Molina, M.; Navarro-González, F.J. Analysis of Rainfall Time Series with Application to Calculation of Return Periods. *Sustainability* **2021**, *13*, 8051. <https://doi.org/10.3390/su13148051>.
440. Amini, S.; Azizian, A.; Daneshkar Arasteh, P. How reliable are TIGGE daily deterministic precipitation forecasts over different climate and topographic conditions of Iran?. *Meteorol. Appl.* **2021**, *28*, e2013. <https://doi.org/10.1002/met.2013>.
441. Hagay, O.; Brenner, S. Sensitivity of Simulations of Extreme Mediterranean Storms to the Specification of Sea Surface Temperature: Comparison of Cases of a Tropical-Like Cyclone and Explosive Cyclogenesis. *Atmosphere* **2021**, *12*, 921. <https://doi.org/10.3390/atmos12070921>.
442. Sanuy, M.; Rigo, T.; Jiménez, J. A.; Llasat, M.C. Classifying compound coastal storm and heavy rainfall events in the north-western Spanish Mediterranean. *Hydrol. Earth Syst. Sci.* **2021**, *25*, 3759–3781. <https://doi.org/10.5194/hess-25-3759-2021>.
443. Lemus-Canovas, M.; Lopez-Bustins, J.A.; Martín-Vide, J.; Halifa-Marin, A.; Insua-Costa, D.; Martinez-Artigas, J.; Trapero, L.; Serrano-Notivoli, R.; Cuadrat J.M. Characterisation of Extreme Precipitation Events in the Pyrenees: From the Local to the Synoptic Scale. *Atmosphere* **2021**, *12*, 665. <https://doi.org/10.3390/atmos12060665>.



444. Bayer Altin, T.; Altin, B.N. Response of hydrological drought to meteorological drought in the eastern Mediterranean Basin of Turkey. *J. Arid Land* **2021**, *13*, 470–486. <https://doi.org/10.1007/s40333-021-0064-7>.
445. Hermoso, A.; Homar, V.; Amengual, A. The sequence of heavy precipitation and flash flooding of 12 and 13 September 2019 in eastern Spain. Part I: Mesoscale diagnostic and sensitivity analysis of precipitation. *J. Hydrometeorol.* **2021**, *22*, 1117–1138. <https://doi.org/10.1175/JHM-D-20-0182.1>.
446. Ramos, A.M.; Roca, R.; Soares, P.M.; Wilson, A.M.; Trigo, R.M.; Ralph, F.M. Uncertainty in different precipitation products in the case of two atmospheric river events. *Environ. Res. Lett.* **2021**, *16*, 045012. <https://doi.org/10.1088/1748-9326/abe25b>.
447. Meseguer-Ruiz, O.; Lopez-Bustins, J.A.; Arbiol-Roca, L.; Martin-Vide, J.; Miró, J.; Estrela, M.J. Temporal changes in extreme precipitation and exposure of tourism in Eastern and South-Eastern Spain. *Theor. Appl. Climatol.* **2021**, *144*, 379–390. <https://doi.org/10.1007/s00704-021-03548-6>.
448. Ledesma, J.L.J.; Ruiz-Pérez, G.; Lupon, A.; Poblador, S.; Futter, M.N.; Sabater, F.; Bernal, S. Future changes in the Dominant Source Layer of riparian lateral water fluxes in a subhumid Mediterranean catchment. *J. Hydrol.* **2021**, *595*, 126014. <https://doi.org/10.1016/j.jhydrol.2021.126014>.
449. Prats, S.A.; Merino, A.; Gonzalez-Perez, J.A.; Verheijen, F.G.A.; De la Rosa, J.M. Can straw-biochar mulching mitigate erosion of wildfire-degraded soils under extreme rainfall?. *Sci. Total Environ.* **2021**, *761*, 143219. <https://doi.org/10.1016/j.scitotenv.2020.143219>.
450. Mimeau, L.; Trambay, Y.; Brocca, L.; Massari, C.; Camici, S.; Finaud-Guyot, P. Modeling the response of soil moisture to climate variability in the Mediterranean region. *Hydrol. Earth Syst. Sci.* **2021**, *25*, 653–669. <https://doi.org/10.5194/hess-25-653-2021>.
451. Ziv, B.; Saaroni, H.; Etkin, A.; Harpaz, T.; Shendrik, L. Formation of Cyclones over the East Mediterranean within Red-Sea Troughs. *Int. J. Climatol.* **2021**, *42*, 577–596. <https://doi.org/10.1002/joc.7261>.
452. Cerdà, A.; Novara, A.; Dlapa, P.; López-Vicente, M.; Úbeda, X.; Popović, Z.; Mekonnen, M.; Terol, E.; Janizadeh, S.; Mbarki, S.; et al. Rainfall and water yield in macizo del caroig, eastern iberian peninsula. Event runoff at plot scale during a rare flash flood at the barranco de benacancil. *Geogr. Res. Lett.* **2021**, *47*, 95–119. <https://doi.org/10.18172/cig.4833>.
453. García-Barrón, L.; Aguilar-Alba, M.; Morales, J.; Sousa A. Risk Analysis of the Maximum Daily Precipitation in the Southwest of the Iberian Peninsula Over the Period 1861–2016. In *Recent Advances in Environmental Science from the Euro-Mediterranean and Surrounding Regions*, 2nd ed.; Ksibi, M., Ghorbal, A., Chakraborty, S., Chaminé, H., Barbieri, M., Guerriero, G., Hentati, O., Negm, A., Lehmann, A., Römbke, J., et al., Eds.; Springer, Cham, 2021; pp. 1945–1949. [https://doi.org/10.1007/978-3-030-51210-1\\_306](https://doi.org/10.1007/978-3-030-51210-1_306).
454. Nadal-Romero, E.; Rodríguez-Caballero, E.; Chamizo, S.; Juez, C.; Cantón, Y.; García-Ruiz, J.M. Mediterranean badlands: Their driving processes and climate change futures. *Earth Surf. Proc. Land.* **2021**. <https://doi.org/10.1002/esp.5088>.
455. Aqnouy, M.; El Messari, J.E.S.; Bouadila, A.; Morabbi, A.; Benaabidate, L.; Al-Djazouli, M.O. Modeling of Continuous and Extreme Hydrological Processes Using Spatially Distributed Models MERCEDES, VICAIR and VISHYR in a Mediterranean Watershed. *Ecol. Eng.* **2021**, *22*, 9–23. <https://doi.org/10.12912/27197050/132098>.
456. Biondi, D.; Greco, A.; De Luca, D.L. Fixed-area vs storm-centered areal reduction factors: a Mediterranean case study. *J. Hydrol.* **2021**, *595*, 125654. <https://doi.org/10.1016/j.jhydrol.2020.125654>.
457. Francipane, A.; Pumo, D.; Sinagra, M.; La Loggia, G.; Noto, L.V. A paradigm of extreme rainfall pluvial floods in complex urban areas: the flood event of 15 July 2020 in Palermo (Italy). *Nat. Hazards Earth Syst. Sci.* **2021**, *21*, 2563–2580. <https://doi.org/10.5194/nhess-21-2563-2021>.
458. Magliulo, P.; Bozzi, F.; Leone, G.; Fiorillo, F.; Leone, N.; Russo, F.; Valente, A. Channel adjustments over 140 years in response to extreme floods and land-use change, Tammaro River, southern Italy. *Geomorphology* **2021**, *383*, 107715. <https://doi.org/10.1016/j.geomorph.2021.107715>.
459. Pumo, D.; Noto, L.V. Exploring the linkage between dew point temperature and precipitation extremes: A multi-time-scale analysis on a semi-arid Mediterranean region. *Atmos. Res.* **2021**, *254*, 105508. <https://doi.org/10.1016/j.atmosres.2021.105508>.
460. Treppiedi, D.; Cipolla, G.; Francipane, A.; Noto, L.V. Detecting precipitation trend using a multiscale approach based on quantile regression over a Mediterranean area. *Int. J. Climatol.* **2021**, *41*, 5938–5955. <https://doi.org/10.1002/joc.7161>.

461. Vergni, L.; Todisco, F.; Di Lena, B. Evaluation of the similarity between drought indices by correlation analysis and Cohen's Kappa test in a Mediterranean area. *Nat. Hazards* **2021**, *108*, 2187-2209. <https://doi.org/10.1007/s11069-021-04775-w>.
