# Supplementary material
Source: MDPI journal article supplement (https://www.mdpi.com/2073-4441/14/5/817)
Supplement: s1 [file s1]

## Supplementary S2: Extreme rainfall and floods

1. List of international peer-reviewed papers found via online on Scopus using keywords like "Extreme rainfall and floods" in combination with "Mediterranean Basin". The list is in chronological order according to the year of publication from 2000 to 2021.
2. Castellarin, A.; Burn, D.H.; Brath, A. Assessing the effectiveness of hydrological similarity measures for flood frequency analysis. *J. Hydrol.* **2001**, *241*, 270-285. [https://doi.org/10.1016/S0022-1694\(00\)00383-8](https://doi.org/10.1016/S0022-1694(00)00383-8).
3. De Michele, C.; Kottegoda, N.T.; Rosso, R. The derivation of areal reduction factor of storm rainfall from its scaling properties. *Water Resour. Res.* **2001**, *37*, 3247-3252. <https://doi.org/10.1029/2001WR000346>.
4. Alessandrini, M.G.; Remedia, G. The most severe floods of the Tiber River in Rome. *IAHS Publ.* **2002**, *271*, 129-132.
5. Alpert, P.; Ben-gai, T.; Baharad, A.; Benjamini, Y.; Yekutieli, D.; Colacino, M.; Diodato, L.; Ramis, C.; Homar, V.; Romero, R.; et al. The paradoxical increase of Mediterranean extreme daily rainfall in spite of decrease in total values. *Geophys. Res. Lett.* **2002**, *29*, 1-4. <https://doi.org/10.1029/2001GL013554>.
6. Claps, P.; Fiorentino, M.; Iacobellis, V. Influence of climate on the flood frequency distribution within a large region of southern Italy. *IAHS Publ.* **2002**, *271*, 25-30.
7. Gabriele, S.; Villani, P. The estimation of rainfall frequency in a Mediterranean environment due to extraordinary combinations of hydrological and climatic conditions. *IAHS Publ.* **2002**, *271*, 45-50.
8. Gioia, G.; Iacobellis, V.; Margiotta, M.R. Assessment of a simplified runoff model for theoretical derivation of the probability distribution of floods. *IAHS Publ.* **2002**, *271*, 271-276.
9. Iacobellis, V.; Claps, P.; Fiorentino, M. Climatic control on the variability of flood distribution. *Hydrol. Earth Syst. Sci.* **2002**, *6*, 229-237. <https://doi.org/10.5194/hess-6-229-2002>.
10. Obled, C.; Bontron, G.; Garçon, R. Quantitative precipitation forecasts: a statistical adaptation of model outputs through an analogues sorting approach. *Atmos. Res.* **2002**, *63*, 303-324. [https://doi.org/10.1016/S0169-8095\(02\)00038-8](https://doi.org/10.1016/S0169-8095(02)00038-8).
11. Rulli, M.C.; Rosso, R. An integrated simulation method for flash-flood risk assessment: 1. Frequency predictions in the Bisagno River by combining stochastic and deterministic methods. *Hydrol. Earth Syst. Sci.* **2002**, *6*, 267-283. <https://doi.org/10.5194/hess-6-267-2002>.
12. Rigo, T.; Llasat, M.D.C. Flash floods and heavy rain events in Catalonia: analysis of the 1996-2000 period. *IAHS Publ.* **2003**, *278*, 269-275.
13. Diodato, N. Local models for rainstorm-induced hazard analysis on Mediterranean river-torrential geomorphological systems. *Nat. Hazards Earth Syst. Sci.* **2004**, *4*, 389-397. <https://doi.org/10.5194/nhess-4-389-2004>.
14. Mazzarella, A.; Rapetti, F. Scale-invariance laws in the recurrence interval of extreme floods: an application to the upper Po river valley (northern Italy). *J. Hydrol.* **2004**, *288*, 264-271. <https://doi.org/10.1016/j.jhydrol.2003.10.017>.
15. Meneguzzo, F.; Menduni, G.; Maracchi, G.; Baldi, M.; Brandani, G.; Crisci, A.; Marrese, F.; Pasqui, M.; Piani, F. Climate analysis and prediction over the Arno River Basin, Italy. In Proceedings of the 14th Conference on Applied Climatology, 84th Annual Meeting of the American Meteorological Society: Seattle, Washington-USA, 2004.
16. Montaldo, N.; Mancini, M.; Rosso, R. Flood hydrograph attenuation induced by a reservoir system: Analysis with a distributed rainfall-runoff model. *Hydrol. Process.* **2004**, *18*, 545-563. <https://doi.org/10.1002/hyp.1337>.
17. Terranova, O. Regional analysis of superficial slope instability risk in Calabria (Italy) through a pluviometrical approach. In *Risk Analysis IV*, Brebbia, C.A. Ed.; WIT Press: Southampton, Boston, UK, 2004; Volume 9, pp. 257-266.
18. Bartholmes, J.; Todini, E. Coupling meteorological and hydrological models for flood forecasting. *Hydrol. Earth Syst. Sci.* **2005**, *9*, 333-346. <https://doi.org/10.5194/hess-9-333-2005>.
19. Calenda, G.; Mancini, C.P.; Volpi, E. Distribution of the extreme peak floods of the Tiber River from the XV century. *Adv. Water Resour.* **2005**, *28*, 615-625. <https://doi.org/10.1016/j.advwatres.2004.09.010>.
20. Cavallo, A.; Giannoni, F. Natural risk warning: Comparison of two methodologies. *Adv. Geosci.* **2005**, *2*, 335-338. <https://doi.org/10.5194/adgeo-2-335-2006>.

21. Faccini, F.; Brandolini, P.; Robbiano, A.; Perasso, L.; Sola, A. Instability, precipitation phenomena and land planning: The flood of 2002 in lower Lavagna valley (Eastern Liguria, Italy). *Geogr. Fis. e Din. Quat.* **2005**, *Suppl. VII*, 145-153.
22. Tomassetti, B.; Coppola, E.; Verdecchia, M.; Visconti, G. Coupling a distributed grid based hydrological model and MM5 meteorological model for flooding alert mapping. *Adv. Geosci.* **2005**, *2*, 59-63. <https://doi.org/10.5194/adgeo-2-59-2005>.
23. Zuliani, A.; Zaggia, L.; Collavini, F.; Zonta, R. Freshwater discharge from the drainage basin to the Venice Lagoon (Italy). *Env. Int.* **2005**, *31*, 929-938. <https://doi.org/10.1016/j.envint.2005.05.004>.
24. Cassardo, C.; Loglisci, N.; Paesano, G.; Rabuffetti, D.; Qian, M.W. The hydrological balance of the October 2000 flood in Piedmont, Italy: Quantitative analysis and simulation. *Phys. Geogr.* **2006**, *27*, 411-434. <https://doi.org/10.2747/0272-3646.27.5.411>.
25. Clarke, M.L.; Rendell, H.M. Hindcasting extreme events: The occurrence and expression of damaging floods and landslides in Southern Italy. *Land Degrad. Dev.* **2006**, *17*, 365-380. <https://doi.org/10.1002/ldr.743>.
26. Fiorentino, M.; Gioia, A.; Iacobellis, V.; Manfreda, S. Analysis on flood generation processes by means of a continuous simulation model. *Adv. Geosci.* **2006**, *7*, 231-236. <https://doi.org/10.5194/adgeo-7-231-2006>.
27. Lastoria, B.; Simonetti, M.R.; Casaioli, M.; Mariani, S.; Monacelli, G. Socio-economic impacts of major floods in Italy from 1951 to 2003. *Adv. Geosci.* **2006**, *7*, 223-229. <https://doi.org/10.5194/adgeo-7-223-2006>.
28. Margaritora, F.G.; Cherubini, E.; Copetti, D.; Legnani, E.; Seminara, M.; Tartari, G.; Vagaggini, D. Recent trophic changes in Lake Pusiano (northern Italy) with particular reference to the influence of hydrodynamics on the zooplankton community. *Chem. Ecol.* **2006**, *22*, S37-S47. <https://doi.org/10.1080/02757540600557611>.
29. Borga, M.; Boscolo, P.; Zanon, F.; Sangati, M. Hydrometeorological analysis of the 29 August 2003 flash flood in the Eastern Italian Alps. *J. Hydrometeorol.* **2007**, *8*, 1049-1067. <https://doi.org/10.1175/JHM593.1>.
30. Cossu, A.; De Waele, J.; Di Gregorio, F. Coastal karst geomorphosites at risk? A case study: the floods of 6-11 December 2004 in central-east Sardinia. *Geol. Soc. Lond. Spec. Publ.* **2007**, *279*, 85-95. <https://doi.org/10.1144/SP279.8>.
31. Fiorentino, M.; Manfreda, S.; Iacobellis, V. Peak runoff contributing area as hydrological signature of the probability distribution of floods. *Adv. Water Resour.* **2007**, *30*, 2123-2134. <https://doi.org/10.1016/j.advwatres.2006.11.017>.
32. Jia, Y.; Gan, H.; You, J.; Li, X.; Niu, C.; Moschini, N.; Pretner, A.; Lecollinet, J. Study on Impact of East Route Project of the South-to-North Water Diversion in China. In *Restoring Our Natural Habitat*, Proceedings of the World Environmental and Water Resources Congress 2007, Tampa, Florida, 15-19 May 2007; Kabbes, K.C., Ed.; American Society of Civil Engineers (ASCE): Reston, Virginia, USA, 2007. [https://doi.org/10.1061/40927\(243\)543](https://doi.org/10.1061/40927(243)543).
33. Natale, L.; Savi, F. Monte Carlo analysis of probability of inundation of Rome. *Environ. Modell. Softw.* **2007**, *22*, 1409-1416. <https://doi.org/10.1016/j.envsoft.2006.12.004>.
34. Norbiato, D.; Borga, M.; Sangati, M.; Zanon, F. Regional frequency analysis of extreme precipitation in the eastern Italian Alps and the August 29, 2003 flash flood. *J. Hydrol.* **2007**, *345*, 149-166. <https://doi.org/10.1016/j.jhydrol.2007.07.009>.
35. Bonelli, P.; Marcacci, P. Thunderstorm nowcasting by means of lightning and radar data: Algorithms and applications in northern Italy. *Nat. Hazards Earth Syst. Sci.* **2008**, *8*, 1187-1198. <https://doi.org/10.5194/nhess-8-1187-2008>.
36. Diodato, N.; Ceccarelli, M.; Bellocchi, G. Decadal and century-long changes in the reconstruction of erosive rainfall anomalies in a Mediterranean fluvial basin. *Earth Surf. Proc. Land.* **2008**, *33*, 2078-2093. <https://doi.org/10.1002/esp.1656>.
37. Märker, M.; Angeli, L.; Bottai, L.; Costantini, R.; Ferrari, R.; Innocenti, L.; Siciliano, G. Assessment of land degradation susceptibility by scenario analysis: A case study in Southern Tuscany, Italy. *Geomorphology* **2008**, *93*, 120-129. <https://doi.org/10.1016/j.geomorph.2006.12.020>.
38. Rabuffetti, D.; Ravazzani, G.; Corbari, C.; Mancini, M. Verification of operational Quantitative Discharge Forecast (QDF) for a regional warning system - The AMPHORE case studies in the upper Po River. *Nat. Hazards Earth Syst. Sci.* **2008**, *8*, 161-173. <https://doi.org/10.5194/nhess-8-161-2008>.

39. Castellarin, A.; Merz, R.; Blöschl, G. Probabilistic envelope curves for extreme rainfall events. *J. Hydrol.* **2009**, 378, 263-271. <https://doi.org/10.1016/j.jhydrol.2009.09.030>.
40. Creutin, J.D.; Borga, M.; Lutoff, C.; Scolobig, A.; Ruin, I.; Créton-Cazanave, L. Catchment dynamics and social response during flash floods: The potential of radar rainfall monitoring for warning procedures. *Meteorol. Appl.* **2009**, 16, 115-125. <https://doi.org/10.1002/met.128>.
41. Halounová, L.; Dixon, R.; Pokrant, H.; Strnad, D.; Van Wyngaarden, R.; Kolář, V.; Cícha, I. RADARSAT Imaging of the 1997 Czech Republic Flood. In *Fluvial Sedimentology VI*; Smith, N.D., Rogers, J., Eds.; Blackwell Science: Oxford, UK, 1999; pp 71-75. <https://doi.org/10.1002/9781444304213.ch6>.
42. Molini, L.; Parodi, A.; Siccardi, F. Dealing with uncertainty: An analysis of the severe weather events over Italy in 2006. *Nat. Hazards Earth Syst. Sci.* **2009**, 9, 1775-1787. <https://doi.org/10.5194/nhess-9-1775-2009>.
43. Petrucci, O.; Polemio, M. The role of meteorological and climatic conditions in the occurrence of damaging hydro-geologic events in Southern Italy. *Nat. Hazards Earth Syst. Sci.* **2009**, 9, 105-118. <https://doi.org/10.5194/nhess-9-105-2009>.
44. Sangati, M.; Borga, M.; Rabuffetti, D.; Bechini, R. Influence of rainfall and soil properties spatial aggregation on extreme flash flood response modelling: an evaluation based on the Sesia river basin, North Western Italy. *Adv. Water Resour.* **2009**, 32, 1090-1106. <https://doi.org/10.1016/j.advwatres.2008.12.007>.
45. Servat, E.; Demuth, S.; Dezetter, A.; Daniell, T. (Eds.) Global Change: Facing Risks and Threats to Water Resources. In Proceedings of the 6th World FRIEND Conference, Fez, Morocco, October 2010; IAHS Publ., IAHS Press: Centre for Ecology and Hydrology, Wallingford, UK, 2010; Volume 340, pp. 221-228.
46. Bodini, A.; Cossu, Q.A. Vulnerability assessment of Central-East Sardinia (Italy) to extreme rainfall events. *Nat. Hazards Earth Syst. Sci.* **2010**, 10, 61-72. <https://doi.org/10.5194/nhess-10-61-2010>.
47. Cremonini, R.; Bechini, R. Heavy rainfall monitoring by polarimetric C-Band weather radars. *Water* **2010**, 2, 838-848. <https://doi.org/10.3390/w2040838>.
48. Marchi, L.; Borga, M.; Preciso, E.; Gaume, E. Characterisation of selected extreme flash floods in Europe and implications for flood risk management. *J. Hydrol.* **2010**, 394, 118-133. <https://doi.org/10.1016/j.jhydrol.2010.07.017>.
49. Napolitano, G.; See, L.; Calvo, B.; Savi, F.; Heppenstall, A. A conceptual and neural network model for real-time flood forecasting of the Tiber River in Rome. *Phys. Chem Earth Pt A/B/C* **2010**, 35, 187-194. <https://doi.org/10.1016/j.pce.2009.12.004>.
50. Petrucci, O.; Polemio, M.; Pasqua, A.A. Flash floods risk variation of steep drainage basins in Calabria (Italy) and the role of rainfall and anthropogenic modifications since 1800. *IAHS Publ.* **2010**, 340, 103-110.
51. Polemio, M. Historical floods and a recent extreme rainfall event in the Murgia karstic environment (Southern Italy). *Z. Geomorphol. Supp.* **2010**, 54, 195-219. <https://doi.org/10.1127/0372-8854/2010/0054S2-0011>.
52. Rossa, A.M.; Laudanna Del Guerra, F.; Borga, M.; Zanon, F.; Settin, T.; Leuenberger, D. Radar-driven high-resolution hydro-meteorological forecasts of the 26 September 2007 Venice flash flood. *J. Hydrol.* **2010**, 394, 230-244. <https://doi.org/10.1016/j.jhydrol.2010.08.035>.
53. Savic, D.; Kapelan, Z.; Butler, D. CCWI 2011: *Computing and Control for the Water Industry: urban water management: challenges and opportunities*. Centre for Water Systems, University of Exeter, United Kingdom, 2011; Volume 1.
54. Savic, D.; Kapelan, Z.; Butler, D. CCWI 2011: *Computing and Control for the Water Industry: urban water management: challenges and opportunities*. Centre for Water Systems, University of Exeter, United Kingdom, 2011; Volume 2.
55. Savic, D.; Kapelan, Z.; Butler, D. CCWI 2011: *Computing and Control for the Water Industry: urban water management : challenges and opportunities*. Centre for Water Systems, University of Exeter, United Kingdom, 2011; Volume 3.
56. Berardi, L.; Laucelli, D.; Giustolisi, O. Supporting flooding risk assessment in ephemeral streams in southern Italy. In Proceedings of the 11<sup>th</sup> International Conference on Computing and Control for the Water Industry: CCWI 2011, Exeter, UK, 5-7 September 2011.

57. Camici, S.; Tarpanelli, A.; Brocca, L.; Franchini, M.; Moramarco, T.; Melone, F. Comparison between Different Approaches for Stochastic Generation of Spatial-Temporal Rainfall Patterns. In *Bearing knowledge for sustainability*, Proceedings of the World Environmental and Water Resources Congress 2011, Beighley, R.E., Killgore, M.W., Eds.; American Society of Civil Engineers: Palm Springs, California, USA, 22-26 May 2011; Volume 1, pp. 4769-4778. [https://doi.org/10.1061/41173\(414\)495](https://doi.org/10.1061/41173(414)495).
58. Tessitore, S.; Di Martire, D.; Martino, R.; Calcaterra, D. Comparison of 2D models for the simulation of the October 1954 debris flow and flood event at Maiori (Campania region, Italy). In Proceedings of the 5th International Conference on Debris - Flow Hazards Mitigation, Padova, Italy, 14-17 June 2011; pp. 513-522. <https://doi.org/10.4408/IJEGE.2011-03.B-057>.
59. Zocatelli, D.; Borga, M.; Nikolopoulos, E.I.; Anagnostou, E.N. Quantifying catchment-scale storm motion and its effects on flood response. *IAHS Publ.* **2011**, 351, 520-525.
60. Brebbia, C. A. *Risk Analysis VIII*; WIT Press, Southampton, UK, 2012.
61. Barbi, A.; Monai, M.; Racca, R.; Rossa, A.M. Recurring features of extreme autumnall rainfall events on the Veneto coastal area. *Nat. Hazards Earth Syst. Sci.* **2012**, 12, 2463-2477. <https://doi.org/10.5194/nhess-12-2463-2012>.
62. Diodato, N.; Fagnano, M. A simple geospatial model climate-based for designing erosive rainfall pattern. In *Environmental Pollution and its relation to Climate Change*; Nemr, A.E., Ed.; Nova Science Publ. Inc.: New York, NY, USA, 2012; pp. 451-467.
63. Doglioni, A.; Simeone, V.; Giustolisi, O. The activation of ephemeral streams in karst catchments of semi-arid regions. *Catena* **2012**, 99, 54-65. <https://doi.org/10.1016/j.catena.2012.07.008>.
64. Pasquaré, F.A.; Oppizzi, P. How do the media affect public perception of climate change and geohazards? An Italian case study. *Global Planet. Change* **2012**, 90-91, 152-157. <https://doi.org/10.1016/j.gloplacha.2011.05.010>.
65. Rojas, R.; Feyen, L.; Bianchi, A.; Dosio, A. Assessment of future flood hazard in Europe using a large ensemble of bias-corrected regional climate simulations. *J. Geophys. Res-Atmos.* **2012**, 117. <https://doi.org/10.1029/2012JD017461>.
66. Sacchi, A.J. Meteorological analysis of floods between Northern Tuscany and Eastern Liguria from 2009 to 2011. *Atti Soc. tosc. Sci. nat., Mem., Serie A.* **2012**, 117-119, 75-88. <https://doi.org/10.2424/ASTSN.M.2012.28>.
67. Arnone E.; Pumo D.; Viola F.; Noto L.V.; La Loggia G. Rainfall statistics changes in Sicily. *Hydrol. Earth Syst. Sci.* **2013**, 17, 2449-2458. <https://doi.org/10.5194/hess-17-2449-2013>.
68. Bocci, C.; Caporali, E.; Petrucci, A. Geoadditive modeling for extreme rainfall data. *AStA Adv. Stat. Anal.* **2013**, 97, 181-193. <https://doi.org/10.1007/s10182-012-0192-7>.
69. Gabriele, S.; Chiaravalloti, F. Using the meteorological information for the regional rainfall frequency analysis: An application to Sicily. *Water Resour. Manage.* **2013**, 27, 1721-1735. <https://doi.org/10.1007/s11269-012-0235-6>.
70. Guarino, P.M.; Menotti, R.M.; Motteran, G.; Serafini, R. Flood and Slope Processes in the Scura Valley (Reatini Mts., Central Apennines, Italy). *Meteoclimatic Analysis and Geomorphological Evolution*. In *Landslide Science and Practice*; Margottini, C., Canuti, P., Sassa, K., Eds.; Springer: Berlin, Germany, 2013; pp. 243-248. [https://doi.org/10.1007/978-3-642-31337-0\\_31](https://doi.org/10.1007/978-3-642-31337-0_31).
71. Moccia, F.D.; Sgobbo, A. Flood hazard: planning approach to risk mitigation. *WIT Trans. Built Env.* **2013**, 134, 89-100. <https://doi.org/10.2495/SAFE130091>.
72. Peres, D.J.; Cancelliere, A. Defining rainfall thresholds for early warning of rainfall-triggered landslides: The case of North-East Sicily. In *Landslide Science and Practice*; Springer: Berlin, Germany, 2013; pp. 257-263.
73. Rebori N.; Molini L.; Casella E.; Comellas A.; Fiori E.; Pignone F.; Siccardi F.; Silvestro F.; Tanelli S.; Parodi A. Extreme rainfall in the mediterranean: What can we learn from observations. *J. Hydrometeorol.* **2013**, 14, 906-922. <https://doi.org/10.1175/JHM-D-12-083.1>.
74. Fiori, E.; Comellas, A.; Molini, L.; Rebori, N.; Siccardi, F.; Gochis, D.J.; Tanelli, S.; Parodi, A. Analysis and hindcast simulations of an extreme rainfall event in the Mediterranean area: The Genoa 2011 case. *Atmos. Res.* **2014**, 138, 13-29. <https://doi.org/10.1016/j.atmosres.2013.10.007>.
75. Nikolopoulos, E.I.; Borga, M.; Zocatelli, D.; Anagnostou, E.N. Catchment-scale storm velocity: Quantification, scale dependence and effect on flood response. *Hydrolog. Sci. J.* **2014**, 59, 1363-1376. <https://doi.org/10.1080/02626667.2014.923889>.

76. Sofia, G.; Prosdocimi, M.; Dalla Fontana, G.; Tarolli, P. Modification of artificial drainage networks during the past half-century: Evidence and effects in a reclamation area in the Veneto floodplain (Italy). *Anthropocene* **2014**, *6*, 48-62. <https://doi.org/10.1016/j.ancene.2014.06.005>.
77. Lucia, A.; Comiti, F.; Borga, M.; Cavalli, M.; Marchi, L. Large Wood Recruitment and Transport During a Severe Flash Flood in North-Western Italy. In *Engineering Geology for Society and Territory*, 1st ed.; Lollino, G., Arattano, M., Rinaldi, M., Giustolisi, O., Marechal, J.C., Grant, G., Eds.; Springer International Publishing: Switzerland, 2014; Volume 3, pp. 159-162. [https://doi.org/10.1007/978-3-319-09054-2\\_32](https://doi.org/10.1007/978-3-319-09054-2_32).
78. D'Amato Avanzi, G.; Galanti, Y.; Giannecchini, R.; Bartelletti, C. Shallow landslides triggered by the 25 October 2011 extreme rainfall in Eastern Liguria (Italy). In *Engineering Geology for Society and Territory*; Lollino, G., Giordan, D., Crosta, G.B., Corominas, J., Azzam, R., Wasowski, J., Sciarra, N., Eds.; Springer International Publishing: Basel, Switzerland, 2015; Volume 2, pp. 515-519.
79. Califano, F.; Mobilia, M.; Longobardi, A. Heavy Rainfall Temporal Characterization in the Peri-Urban Solofrana River Basin, Southern Italy. *Procedia Engineer.* **2015**, *119*, 1129-1138. <https://doi.org/10.1016/j.proeng.2015.08.957>.
80. Cremonini, R.; Tiranti, D.; Barbero, S. The Urban Flooding Early Warning System of the Greater Turin (North-Western Italy) Based on Weather-Radar Observations. In *Engineering Geology for Society and Territory*, Lollino, G., Manconi, A., Guzzetti, F., Culshaw, M., Bobrowsky, P., Luino, F., Eds.; Springer International Publishing: Switzerland, 2015; Volume 5, pp. 837-842. [https://doi.org/10.1007/978-3-319-09048-1\\_162](https://doi.org/10.1007/978-3-319-09048-1_162).
81. Doglioni A., Galeandro A., Simeone V. The Generation of Runoff Through Ephemeral Streams. In *Engineering Geology for Society and Territory*, Lollino, G., Arattano, M., Rinaldi, M., Giustolisi, O., Marechal, J.C., Grant, G., Eds.; Springer International Publishing: Switzerland, 2015; Volume 3, pp. 181-184. [https://doi.org/10.1007/978-3-319-09054-2\\_36](https://doi.org/10.1007/978-3-319-09054-2_36).
82. Faccini, F.; Luino, F.; Sacchini, A.; Turconi, L. The 4th October 2010 flash flood event in Genoa Sestri Ponente (Liguria, Italy). *Disaster Adv.* **2015**, *8*, 1-14.
83. Galve, J.P.; Cevasco, A.; Brandolini, P.; Soldati, M. Assessment of shallow landslide risk mitigation measures based on land use planning through probabilistic modelling. *Landslides* **2015**, *12*, 101-114. <https://doi.org/10.1007/s10346-014-0478-9>.
84. Herget, J.; Kapala, A.; Krell, M.; Rustemeier, E.; Simmer, C.; Wyss, A. The millennium flood of July 1342 revisited. *Catena* **2015**, *130*, 82-94. <https://doi.org/10.1016/j.catena.2014.12.010>.
85. Liuzzo, L.; Freni, G. Analysis of extreme rainfall trends in sicily for the evaluation of depth-duration-frequency curves in climate change scenarios. *J. Hydrol. Eng.* **2015**, *20*. [https://doi.org/10.1061/\(ASCE\)HE.1943-5584.0001230](https://doi.org/10.1061/(ASCE)HE.1943-5584.0001230).
86. Campo, L.; Caparrini, F. An Assessment of the Water Resources Availability and of the Flood Hazard in a Climate Change Scenario in Tuscany. In *Engineering Geology for Society and Territory*, Lollino G., Manconi A., Clague J., Shan W., Chiarle M., Eds.; Springer International Publishing: Switzerland, 2015; Volume 1, pp 129-133. [https://doi.org/10.1007/978-3-319-09300-0\\_25](https://doi.org/10.1007/978-3-319-09300-0_25).
87. Maugeri, M.; Brunetti, M.; Garzoglio, M.; Simolo, C. High-resolution analysis of 1 day extreme precipitation in Sicily. *Nat. Hazards Earth Syst. Sci.* **2015**, *15*, 2347-2358. <https://doi.org/10.5194/nhess-15-2347-2015>.
88. Santo, A.; Santangelo, N.; Di Crescenzo, G.; Scorpio, V.; De Falco, M.; Chirico, G.B. Flash flood occurrence and magnitude assessment in an alluvial fan context: the October 2011 event in the Southern Apennines. *Nat. Hazards* **2015**, *78*, 417-442. <https://doi.org/10.1007/s11069-015-1728-4>.
89. Vallebona, C.; Pellegrino, E.; Frumento, P.; Bonari, E. Temporal trends in extreme rainfall intensity and erosivity in the Mediterranean region: a case study in southern Tuscany, Italy. *Climatic Change* **2015**, *128*, 139-151. <https://doi.org/10.1007/s10584-014-1287-9>.
90. Aceto, L.; Caloiero, T.; Pasqua, A.A.; Petrucci, O. Analysis of damaging hydrogeological events in a Mediterranean region (Calabria). *J. Hydrol.* **2016**, *541*, 510-522. <https://doi.org/10.1016/j.jhydrol.2015.12.041>.
91. Amponsah, W.; Marchi, L.; Zocatelli, D.; Boni, G.; Cavalli, M.; Comiti, F.; Crema, S.; Lucía, A.; Marra, F.; Borga, M. Hydrometeorological characterization of a flash flood associated with major geomorphic effects: Assessment of peak discharge uncertainties and analysis of the runoff response. *J. Hydrometeorol.* **2016**, *17*, 3063-3077. <https://doi.org/10.1175/JHM-D-16-0081.1>.

92. Barton, Y.; Giannakaki, P.; von Waldow, H.; Chevalier, C.; Pfahl, S.; Martius, O. Clustering of regional-scale extreme precipitation events in southern Switzerland. *Mon. Weather Rev.* **2016**, *144*, 347-369. <https://doi.org/10.1175/MWR-D-15-0205.1>.
93. Bonaccorso, B.; Aronica, G.T. Estimating temporal changes in extreme rainfall in Sicily Region (Italy). *Water Resour. Manag.* **2016**, *30*, 5651-5670. <https://doi.org/10.1007/s11269-016-1442-3>.
94. Calvello, M.; Pecoraro, G.; Piciullo, L. The regional early warning system for rainfall-induced landslides operating in Campania (Italy): performance evaluation of two warning strategies. In Proceedings of the 1st IMEKO TC-4 International Workshop on Metrology for Geotechnics, MetroGeotechnics, Benevento, Italy, 17-18 March 2016; pp. 255-260.
95. Capello, M.; Cutroneo, L.; Ferretti, G.; Gallino, S.; Canepa, G. Changes in the physical characteristics of the water column at the mouth of a torrent during an extreme rainfall event. *J. Hydrol.* **2016**, *541*, 146-157. <https://doi.org/10.1016/j.jhydrol.2015.12.009>.
96. Chen, L.; van Westen, C.J.; Hussin, H.; Ciurean, R.L.; Turkington, T.; Chavarro-Rincon, D.; Shrestha, D.P. Integrating expert opinion with modelling for quantitative multi-hazard risk assessment in the Eastern Italian Alps. *Geomorphology* **2016**, *273*, 150-167. <https://doi.org/10.1016/j.geomorph.2016.07.041>.
97. Fiorillo, F.; Diodato, N.; Meo, M. Reconstruction of a storm map and new approach in the definition of categories of the extreme rainfall, northeastern Sicily. *Water* **2016**, *8*, 330. <https://doi.org/10.3390/w8080330>.
98. Longobardi, A.; Diodato, N.; Mobilia, M. Historical storminess and hydro-geological hazard temporal evolution in the solofrana river basin - Southern Italy. *Water* **2016**, *8*, 398. <https://doi.org/10.3390/w8090398>.
99. Piras, M.; Mascaro, G.; Deidda, R.; Vivoni, E.R. Impacts of climate change on precipitation and discharge extremes through the use of statistical downscaling approaches in a Mediterranean basin. *Sci. Total Environ.* **2016**, *543*, 952-964. <https://doi.org/10.1016/j.scitotenv.2015.06.088>.
100. Ravazzani, G.; Amengual, A.; Ceppi, A.; Homar, V.; Romero, R.; Lombardi, G.; Mancini, M. Potentialities of ensemble strategies for flood forecasting over the Milano urban area. *J. Hydrol.* **2016**, *539*, 237-253. <https://doi.org/10.1016/j.jhydrol.2016.05.023>.
101. Bonaccorso, B.; Brigandì, G.; Aronica, G.T. Combining regional rainfall frequency analysis and rainfall-runoff modelling to derive frequency distributions of peak flows in ungauged basins: a proposal for Sicily region (Italy). *Adv. Geosci.* **2017**, *44*, 15-22. <https://doi.org/10.5194/adgeo-44-15-2017>.
102. Caloiero, T.; Coscarelli, R.; Ferrari, E.; Sirangelo, B. Temporal analysis of rainfall categories in Southern Italy (Calabria Region). *Environ. Process.* **2017**, *4*, 113-124. <https://doi.org/10.1007/s40710-017-0215-1>.
103. Camici, S.; Brocca, L.; Moramarco, T. Accuracy versus variability of climate projections for flood assessment in central Italy. *Climatic Change* **2017**, *141*, 273-286. <https://doi.org/10.1007/s10584-016-1876-x>.
104. Fabbrocini, A.; Cassin, D.; Santucci, A.; Scirocco, T.; Specchiulli, A.; D'Adamo, R. Early chemical and ecotoxicological responses of the Varano lagoon (SE Italy) to a flood event. *Ecotox. Environ. Safe.* **2017**, *144*, 178-186. <https://doi.org/10.1016/j.ecoenv.2017.06.025>.
105. Gabriele, S.; Chiaravalloti, F.; Procopio, A. Radar-rain-gauge rainfall estimation for hydrological applications in small catchments. *Adv. Geosci.* **2017**, *44*, 61-66. <https://doi.org/10.5194/adgeo-44-61-2017>.
106. Garofalo, G.; Giordano, A.; Piro, P.; Spezzano, G.; Vinci, A. A distributed real-time approach for mitigating CSO and flooding in urban drainage systems. *J. Netw. Comput. Appl.* **2017**, *78*, 30-42. <https://doi.org/10.1016/j.jnca.2016.11.004>.
107. Giambastiani, B.M.S.; Colombani, N.; Greggio, N.; Antonellini, M.; Mastrocicco, M. Coastal aquifer response to extreme storm events in Emilia-Romagna, Italy. *Hydrol. Process.* **2017**, *31*, 1613-1621. <https://doi.org/10.1002/hyp.11130>.
108. Giordan, D.; Cignetti, M.; Baldo, M.; Godone, D. Relationship between man-made environment and slope stability: the case of 2014 rainfall events in the terraced landscape of the Liguria region (northwestern Italy). *Geomat. Nat. Haz. Risk* **2017**, *8*, 1833-1852. <https://doi.org/10.1080/19475705.2017.1391129>.
109. Lagasio, M.; Parodi, A.; Procopio, R.; Rachidi, F.; Fiori, E. Lightning Potential Index performances in multimicrophysical cloud-resolving simulations of a back-building mesoscale convective system: The Genoa 2014 event. *J. Geophys. Res-Atmos.* **2017**, *122*, 4238-4257. <https://doi.org/10.1002/2016JD026115>.

110. Martinotti, M.E.; Pisano, L.; Marchesini, I.; Rossi, M.; Peruccacci, S.; Brunetti, M.T.; Melillo, M.; Amoruso, G.; Loiacono, P.; Vennari, C.; et al. Landslides, floods and sinkholes in a karst environment: the 1-6 September 2014 Gargano event, southern Italy. *Nat. Hazards Earth Syst. Sci.* **2017**, *17*, 467-480. <https://doi.org/10.5194/nhess-17-467-2017>.
111. Amponsah, W.; Ayrál, P.-A.; Boudevillain, B.; Bouvier, C.; Braud, I.; Brunet, P.; Delrieu, G.; Didon-Lescot, J.-F.; Gaume, E.; Lebouc, L.; et al. Integrated high-resolution dataset of high-intensity European and Mediterranean flash floods. *Earth Syst. Sci. Data* **2018**, *10*, 1783-1794. <https://doi.org/10.5194/essd-10-1783-2018>.
112. Caporali, E.; Chiarello, V.; Petrucci, A. Regional frequency analysis and geosadditive modeling for design storm estimates in the Arno river basin (Italy). *Environ. Ecol. Stat.* **2018**, *25*, 31-52. <https://doi.org/10.1007/s10651-018-0399-1>.
113. Cioffi, F.; De Bonis Trapella, A.; Conticello, F.R. Efficiency assessment of existing pumping/hydraulic network systems to mitigate flooding in low-lying coastal regions under different scenarios of sea level rise: The Mazzocchio area study case. *Water* **2018**, *10*, 820. <https://doi.org/10.3390/w10070820>.
114. Conticello, F.; Cioffi, F.; Merz, B.; Lall, U. An event synchronization method to link heavy rainfall events and large-scale atmospheric circulation features. *Int. J. Climatol.* **2018**, *38*, 1421-1437. <https://doi.org/10.1002/joc.5255>.
115. Destro, E.; Amponsah, W.; Nikolopoulos, E.I.; Marchi, L.; Marra, F.; Zoccatelli, D.; Borga, M. Coupled prediction of flash flood response and debris flow occurrence: Application on an alpine extreme flood event. *J. Hydrol.* **2018**, *558*, 225-237. <https://doi.org/10.1016/j.jhydrol.2018.01.021>.
116. Esposito, G.; Matano, F.; Scepi, G. Analysis of increasing flash flood frequency in the densely urbanized coastline of the Campi Flegrei volcanic area, Italy. *Front. Earth Sci.* **2018**, *6*, 63. <https://doi.org/10.3389/feart.2018.00063>.
117. Fiorillo, F.; Diodato, N.; Meo, M.; Pagnozzi, M. Landslides and flash floods induced by the storm of 22nd November 2011 in northeastern Sicily. *Environ. Earth Sci.* **2018**, *77*, 602. <https://doi.org/10.1007/s12665-018-7788-5>.
118. Gallus, W.A., Jr.; Parodi, A.; Maugeri, M. Possible impacts of a changing climate on intense Ligurian Sea rainfall events. *Int. J. Climatol.* **2018**, *38*, e323-e329. <https://doi.org/10.1002/joc.5372>.
119. Lazzari, M.; Piccarreta, M. Landslide disasters triggered by extreme rainfall events: The case of Montescaglioso (Basilicata, Southern Italy). *Geosciences* **2018**, *8*, 377. <https://doi.org/10.3390/geosciences8100377>.
120. Nardi, F.; Annis, A.; Biscarini, C. On the impact of urbanization on flood hydrology of small ungauged basins: the case study of the Tiber river tributary network within the city of Rome. *J. Flood Risk Manag.* **2018**, *11*, S594-S603. <https://doi.org/10.1111/jfr3.12186>.
121. Puppio, M.L.; Novelli, S.; Sassu, M. Failure evidences of reduced span bridges in case of extreme rainfalls the case of Livorno. *Frat. ed Integrita Strutt.* **2018**, *12*, 190-202. <https://doi.org/10.3221/IGF-ESIS.46.18>.
122. Silvestro, F.; Parodi, A.; Campo, L.; Ferraris, L. Analysis of the streamflow extremes and long-term water balance in the Liguria region of Italy using a cloud-permitting grid spacing reanalysis dataset. *Hydrol. Earth Syst. Sci.* **2018**, *22*, 5403-5426. <https://doi.org/10.5194/hess-22-5403-2018>.
123. Tramblay, Y.; Somot, S. Future evolution of extreme precipitation in the Mediterranean. *Climatic Change* **2018**, *151*, 289-302. <https://doi.org/10.1007/s10584-018-2300-5>.
124. Agostini, M.; Galanti, Y.; Del Seppia, N.; D'Amato Avanzi, G.; Giannecchini, R. Landslide database and susceptibility map updating of a test area in the Serchio River basin (northern Tuscany, Italy). *Rendiconti Online Soc. Geol. Ital.* **2019**, *48*, 29-34. <https://doi.org/10.3301/ROL.2019.34>.
125. Colli, M.; Stagnaro, M.; Caridi, A.; Lanza, L.G.; Randazzo, A.; Pastorino, M.; Caviglia, D.D.; Delucchi, A. A Field Experiment of Rainfall Intensity Estimation Based on the Analysis of Satellite-to-Earth Microwave Link Attenuation. In *Applications in Electronics Pervading Industry, Environment and Society-ApplePies 2018*; Saponara, S., De Gloria, A., Eds.; Springer International Publishing: Switzerland, 2019; pp. 137-144. [https://doi.org/10.1007/978-3-030-11973-7\\_17](https://doi.org/10.1007/978-3-030-11973-7_17).
126. Corral, C.; Berenguer, M.; Sempere-Torres, D.; Poletti, L.; Silvestro, F.; Rebora, N. Comparison of two early warning systems for regional flash flood hazard forecasting. *J. Hydrol.* **2019**, *572*, 603-619. <https://doi.org/10.1016/j.jhydrol.2019.03.026>.
127. Esposito, G.; Parodi, A.; Lagasio, M.; Masi, R.; Nanni, G.; Russo, F.; Alfano, S.; Giannatiempo, G. Characterizing Consecutive Flooding Events after the 2017 Mt. Salto Wildfires (Southern Italy):

- Hazard and Emergency Management Implications. *Water* **2019**, *11*, 2663. <https://doi.org/10.3390/w11122663>.
128. Fortelli, A.; Scafetta, N.; Mazzarella, A. Nowcasting and real-time monitoring of heavy rainfall events inducing flash-floods: an application to Phlegraean area (Central-Southern Italy). *Nat. Hazards* **2019**, *97*, 861-889. <https://doi.org/10.1007/s11069-019-03680-7>.
  129. Fronzi, D.; Tazioli, A. Groundwater and flood events in different hydrogeological periods: A case study in the Aspio river (Marche Region). *Ital. J. Eng. Geol. Environ.* **2019**, *1*, 5-16. <https://doi.org/10.4408/IJEGE.2019-01.O-01>.
  130. García-Marín, A.P.; Morbidelli, R.; Saltalippi, C.; Cifrodelli, M.; Estévez, J.; Flammini, A. On the choice of the optimal frequency analysis of annual extreme rainfall by multifractal approach. *J. Hydrol.* **2019**, *575*, 1267-1279. <https://doi.org/10.1016/j.jhydrol.2019.06.013>.
  131. Liuzzo, L.; Freni, G. Quantifying the Uncertainty Related to Climate Change in the Assessment of Urban Flooding - A Case Study. *Water* **2019**, *11*, 2072. <https://doi.org/10.3390/w11102072>.
  132. Pucci, A.; Sousa, H.M.; Matos, J.C. Predicting the change of hydraulic loads on bridges: A case study in Italy with a 100-year database. In Proceedings of the IABSE Symposium Congress 2019, The Evolving Metropolis; New York, USA, 04-06 September 2019; pp. 443-448. <https://doi.org/10.2749/newyork.2019.0442>.
  133. Pucci, A.; Puppio, M.L.; Giresini, L.; Sousa, H.; Matos, J.; Sassu, M. Method for sustainable large-scale bridges survey. In *Towards a Resilient Built Environment Risk and Asset Management*; International Association for Bridge and Structural Engineering; Guimarães, Portugal, 2019; pp. 1034-1041.
  134. Sappa, G.; Ferranti, F.; Iacurto, S.; De Filippi, F.M. A method to contrast the impact of extreme precipitation: A case study from central Italy. *IOP Conf. Ser. Mater. Sci. Eng.* **2019**, *471*, 1-7. <https://doi.org/10.1088/1757-899X/471/10/102052>.
  135. Ballesteros-Canovas, J.A.; Bombino, G.; D'Agostino, D.; Denisi, P.; Labate, A.; Stoffel, M.; Zema, D.A.; Zimbone, S.M. Tree-ring based, regional-scale reconstruction of flash floods in Mediterranean mountain torrents. *Catena* **2020**, *189*, 104481. <https://doi.org/10.1016/j.catena.2020.104481>.
  136. Bentivenga, M.; Giano, S.I.; Piccarreta, M. Recent Increase of Flood Frequency in the Ionian Belt of Basilicata Region, Southern Italy: Human or Climatic Changes?. *Water* **2020**, *12*, 2062. <https://doi.org/10.3390/w12072062>.
  137. Bonaccorso, B.; Brigandi, G.; Aronica, G.T. Regional sub-hourly extreme rainfall estimates in Sicily under a scale invariance framework. *Water Resour. Manage.* **2020**, *34*, 4363-4380. <https://doi.org/10.1007/s11269-020-02667-5>.
  138. Cipolla, G.; Francipane, A.; Noto, L.V. Classification of extreme rainfall for a Mediterranean region by means of atmospheric circulation patterns and reanalysis data. *Water Resour. Manage.* **2020**, *34*, 3219-3235. <https://doi.org/10.1007/s11269-020-02609-1>.
  139. Cristiano, E.; Urru, S.; Farris, S.; Ruggiu, D.; Deidda, R.; Viola, F. Analysis of potential benefits on flood mitigation of a CAM green roof in Mediterranean urban areas. *Build. Environ.* **2020**, *183*, 107179. <https://doi.org/10.1016/j.buildenv.2020.107179>.
  140. Greco, A.; De Luca, D.L.; Avolio, E. Heavy precipitation systems in Calabria Region (Southern Italy): High-resolution observed rainfall and large-scale atmospheric pattern analysis. *Water* **2020**, *12*, 1468. <https://doi.org/10.3390/w12051468>.
  141. Nannoni, A.; Vigna, B.; Fiorucci, A.; Antonellini, M.; De Waele, J. Effects of an extreme flood event on an alpine karst system. *J. Hydrol.* **2020**, *590*, 125493. <https://doi.org/10.1016/j.jhydrol.2020.125493>.
  142. Pelosi, A.; Furcolo, P.; Rossi, F.; Villani, P. The characterization of extraordinary extreme events (EEEs) for the assessment of design rainfall depths with high return periods. *Hydrol. Process.* **2020**, *34*, 2543-2559. <https://doi.org/10.1002/hyp.13747>.
  143. Persiano, S.; Ferri, E.; Antolini, G.; Domeneghetti, A.; Pavan, V.; Castellarin, A. Changes in seasonality and magnitude of sub-daily rainfall extremes in Emilia-Romagna (Italy) and potential influence on regional rainfall frequency estimation. *J. Hydrol. Regional Stud.* **2020**, *32*, 100751. <https://doi.org/10.1016/j.ejrh.2020.100751>.
  144. Samela, C.; Persiano, S.; Bagli, S.; Luzzi, V.; Mazzoli, P.; Humer, G.; Reithofer, A.; Essenfelder, A.; Amadio, M.; Mysiak, J.; et al. Safer\_RAIN: a DEM-based hierarchical filling-&-Spilling algorithm for pluvial flood hazard assessment and mapping across large urban areas. *Water* **2020**, *12*, 1514. <https://doi.org/10.3390/w12061514>.



145. Segadelli, S.; Grazzini, F.; Adorni, M.; De Nardo, M.T.; Fornasiero, A.; Chelli, A.; Cantonati, M. Predicting extreme-precipitation effects on the geomorphology of small mountain catchments: Towards an improved understanding of the consequences for freshwater biodiversity and ecosystems. *Water* **2020**, *12*, 79. <https://doi.org/10.3390/w12010079>.
146. Azizi, K.; Meier, C.I. Urban Pluvial Flood Risk Assessment: Challenges and Opportunities for Improvement Using a Community-Based Approach. In Proceedings of the World Environmental and Water Resources Congress, Online Conference, 7-11 June 2021; pp. 350-361. <https://doi.org/10.1061/9780784483466.033>.
147. Biondi, D.; Greco, A.; De Luca, D.L. Fixed-area vs storm-centered areal reduction factors: a Mediterranean case study. *J. Hydrol.* **2021**, *595*, 125654. <https://doi.org/10.1016/j.jhydrol.2020.125654>.
148. Capecchi, V.; Antonini, A.; Benedetti, R.; Fibbi, L.; Melani, S.; Rovai, L.; Ricchi, A.; Cerrai, D. Assimilating X-and S-band Radar Data for a Heavy Precipitation Event in Italy. *Water* **2021**, *13*, 1727:1-1727:26. <https://doi.org/10.3390/w13131727>.
149. Diodato, N.; Gómara, I.; Baronetti, A.; Fratianni, S.; Bellocchi, G. Reconstruction of erosivity density in northwest Italy since 1701. *Hydrolog. Sci. J.* **2021**, *66*, 1185-1196. <https://doi.org/10.1080/02626667.2021.1918696>.
150. Francipane, A.; Pumo, D.; Sinagra, M.; La Loggia, G.; Noto, L.V. A paradigm of extreme rainfall pluvial floods in complex urban areas: the flood event of 15 July 2020 in Palermo (Italy). *Nat. Hazards Earth Syst. Sci.* **2021**, *21*, 2563-2580. <https://doi.org/10.5194/nhess-21-2563-2021>.
151. Magliulo, P.; Bozzi, F.; Leone, G.; Fiorillo, F.; Leone, N.; Russo, F.; Valente, A. Channel adjustments over 140 years in response to extreme floods and land-use change, Tammaro River, southern Italy. *Geomorphology* **2021**, *383*, 107715. <https://doi.org/10.1016/j.geomorph.2021.107715>.
152. Nanni, P.; Peres, D.J.; Musumeci, R.E.; Cancelliere, A. Worry about Climate Change and Urban Flooding Risk Preparedness in Southern Italy: A Survey in the Simeto River Valley (Sicily, Italy). *Resources* **2021**, *10*, 25. <https://doi.org/10.3390/resources10030025>.
153. Pasculli, A.; Cinosi, J.; Turconi, L.; Sciarra, N. Learning Case Study of a Shallow-Water Model to Assess an Early-Warning System for Fast Alpine Muddy-Debris-Flow. *Water* **2021**, *13*, 750. <https://doi.org/10.3390/w13060750>.
154. Pelosi A., Villani P., Chirico G.B. Rainfall Extraordinary Extreme Events (EEEs) Frequency and Magnitude Assessment: The EEE Occurred on 14th-15th October 2015 in Benevento Area (Southern Italy). In *Computational Science and Its Applications - ICCSA 2021*, Gervasi, O., Murgante, B., Misra, S., Garau, C., Blečić, I., Taniar, D., Apduhan, B.O., Rocha, A.M.A.C., Tarantino, E., Torre, C.M., Eds.; Springer International Publishing: Switzerland, 2021; pp. 264-278. [https://doi.org/10.1007/978-3-030-87010-2\\_18](https://doi.org/10.1007/978-3-030-87010-2_18).
155. Pumo, D.; Noto, L.V. Exploring the linkage between dew point temperature and precipitation extremes: A multi-time-scale analysis on a semi-arid Mediterranean region. *Atmos. Res.* **2021**, *254*, 105508. <https://doi.org/10.1016/j.atmosres.2021.105508>.
156. Soboyejo, L.A.; Giambastiani, B.M.S.; Molducci, M.; Antonellini, M. Different processes affecting long-term Ravenna coastal drainage basins (Italy): implications for water management. *Environ. Earth Sci.* **2021**, *80*, 493. <https://doi.org/10.1007/s12665-021-09774-5>.
157. Zanchetta, G.; Bini, M.; Bloomfield, K.; Izdebski, A.; Vivoli, N.; Regattieri, E.; Isola, I.; Drysdale, R.N.; Bajo, P.; Hellstrom, J.C.; et al. Beyond one-way determinism: San Frediano's miracle and climate change in Central and Northern Italy in late antiquity. *Climatic Change* **2021**, *165*, 25. <https://doi.org/10.1007/s10584-021-03043-x>
